# Supplementary material for: A Pseudomonas Lysogenic Bacteriophage Crossing the Antarctic and Arctic, Representing a New Genus of Autographiviridae
Source: MDPI journal article supplement (doi:10.3390/ijms24087662), 2023-04-21
Supplement: s1 [file s1]

**Table S1.** Identified prophage regions of *Pseudomonas* sp. D3.

| Region | Region Length | Completeness | Score | # Total Proteins | Most Common Phage                          | GC %   |
|--------|---------------|--------------|-------|------------------|--------------------------------------------|--------|
| 1      | 65.1Kb        | intact       | 150   | 83               | PHAGE_Vibrio_VP882_NC_009016(15)           | 58.74% |
| 2      | 26.9Kb        | incomplete   | 50    | 15               | PHAGE_Burkho_phi1026b_NC_005284(2)         | 57.51% |
| 3      | 42.8Kb        | questionable | 82    | 49               | PHAGE_Pseudo_Dobby_NC_048109(27)           | 57.39% |
| 4      | 44.1Kb        | intact       | 110   | 33               | PHAGE_Pseudo_YMC11/02/R656_NC_028657(12)   | 59.21% |
| 5      | 23.2Kb        | questionable | 90    | 17               | PHAGE_Pseudo_YMC11/02/R656_NC_028657(3)    | 56.26% |
| 6      | 40.8Kb        | incomplete   | 40    | 37               | PHAGE_Pseudo_phiPsa17_NC_047747(15)        | 54.01% |
| 7      | 6.7Kb         | incomplete   | 40    | 7                | PHAGE_Salmon_SJ46_NC_031129(3)             | 51.71% |
| 8      | 41.8Kb        | questionable | 70    | 54               | PHAGE_Pseudo_MD8_NC_031091(11)             | 58.32% |
| 9      | 44Kb          | intact       | 150   | 53               | PHAGE_Pseudo_F10_NC_007805(14)             | 58.35% |
| 10     | 30.1Kb        | incomplete   | 40    | 15               | PHAGE_Escher_500465_1_NC_049342(5)         | 58.95% |
| 11     | 22.2Kb        | incomplete   | 30    | 6                | PHAGE_Klebsi_ST147_VIM1phi7.1_NC_049451(2) | 59.47% |

**Total:** 11 prophage regions have been identified, of which 3 regions are intact, 5 regions are incomplete, and 3 regions are questionable.

■ Intact (score > 90)

■ Questionable (score 70-90)

■ Incomplete (score < 70)

**Region:** The number assigned to the region.

**Region Length:** The length of the sequence of that region (in bp).

**Completeness:** A prediction of whether the region contains an intact or incomplete prophage based on the above criteria.

**Score:** The score of the region is based on the above criteria.

**# Total Proteins:** The number of ORFs present in the region.

**Most Common Phage:** The phage(s) with the highest number of proteins most similar to those in the region.

**GC %:** The percentage of GC nucleotides of the region.

**Table S2.** Pairwise comparisons of *Pseudomonas* sp. D3 and *Pseudomonas* sp. G11 genomes vs. type strain genomes.

| Query strain               | Subject strain                                | dDDH (d0,<br>in %) | dDDH (d4,<br>in %) | dDDH (d6,<br>in %) |
|----------------------------|-----------------------------------------------|--------------------|--------------------|--------------------|
| <i>Pseudomonas</i> sp. D3  | <i>Pseudomonas veronii</i> DSM 11331          | 67.2               | 54.4               | 66.3               |
| <i>Pseudomonas</i> sp. G11 | <i>Pseudomonas grimontii</i> DSM 17515        | 55.8               | 37.4               | 51.5               |
| <i>Pseudomonas</i> sp. G11 | <i>Pseudomonas marginalis</i> DSM 13124       | 55.1               | 37.2               | 50.9               |
| <i>Pseudomonas</i> sp. D3  | <i>Pseudomonas fildesensis</i> KG01           | 58.1               | 37                 | 53.2               |
| <i>Pseudomonas</i> sp. D3  | <i>Pseudomonas</i> sp. G11                    | 51.8               | 36.8               | 48.1               |
| <i>Pseudomonas</i> sp. D3  | <i>Pseudomonas extremaustralis</i> 14-3       | 55                 | 36.6               | 50.6               |
| <i>Pseudomonas</i> sp. G11 | <i>Pseudomonas fildesensis</i> KG01           | 54.2               | 36.5               | 49.9               |
| <i>Pseudomonas</i> sp. G11 | <i>Pseudomonas veronii</i> DSM 11331          | 55.2               | 36.2               | 50.6               |
| <i>Pseudomonas</i> sp. D3  | <i>Pseudomonas grimontii</i> DSM 17515        | 52.3               | 35.5               | 48                 |
| <i>Pseudomonas</i> sp. G11 | <i>Pseudomonas aylmerensis</i> S1E40          | 49.5               | 35.5               | 45.9               |
| <i>Pseudomonas</i> sp. G11 | <i>Pseudomonas extremaustralis</i> 14-3       | 48.2               | 35.3               | 44.8               |
| <i>Pseudomonas</i> sp. D3  | <i>Pseudomonas marginalis</i> DSM 13124       | 51.3               | 35.3               | 47.2               |
| <i>Pseudomonas</i> sp. D3  | <i>Pseudomonas aylmerensis</i> S1E40          | 49.4               | 34.9               | 45.6               |
| <i>Pseudomonas</i> sp. G11 | <i>Pseudomonas cyclaminis</i> MAFF 301449T    | 48.5               | 34.8               | 44.9               |
| <i>Pseudomonas</i> sp. G11 | <i>Pseudomonas petroselini</i> MAFF 311094    | 51.9               | 34.7               | 47.5               |
| <i>Pseudomonas</i> sp. G11 | <i>Pseudomonas pergaminensis</i> 1008T        | 51                 | 34.6               | 46.7               |
| <i>Pseudomonas</i> sp. G11 | <i>Pseudomonas allii</i> MAFF 301514          | 53.4               | 34.6               | 48.6               |
| <i>Pseudomonas</i> sp. G11 | <i>Pseudomonas azotoformans</i> LMG 21611     | 51.8               | 34.6               | 47.3               |
| <i>Pseudomonas</i> sp. G11 | <i>Pseudomonas marginalis</i> ICMP 3553       | 52.1               | 34.5               | 47.6               |
| <i>Pseudomonas</i> sp. D3  | <i>Pseudomonas petroselini</i> MAFF 311094    | 48.6               | 34.5               | 44.9               |
| <i>Pseudomonas</i> sp. D3  | <i>Pseudomonas azotoformans</i> LMG 21611     | 50.3               | 34.4               | 46.2               |
| <i>Pseudomonas</i> sp. G11 | <i>Pseudomonas extremorientalis</i> LMG 19695 | 52.5               | 34.4               | 47.8               |
| <i>Pseudomonas</i> sp. D3  | <i>Pseudomonas marginalis</i> ICMP 3553       | 50.8               | 34.4               | 46.5               |
| <i>Pseudomonas</i> sp. D3  | <i>Pseudomonas pergaminensis</i> 1008T        | 50.1               | 34.3               | 46                 |
| <i>Pseudomonas</i> sp. D3  | <i>Pseudomonas extremorientalis</i> LMG 19695 | 51.3               | 34.2               | 46.8               |
| <i>Pseudomonas</i> sp. D3  | <i>Pseudomonas cyclaminis</i> MAFF 301449T    | 48.9               | 34.2               | 45                 |
| <i>Pseudomonas</i> sp. D3  | <i>Pseudomonas allii</i> MAFF 301514          | 49.4               | 34.2               | 45.4               |
| <i>Pseudomonas</i> sp. G11 | <i>Pseudomonas antarctica</i> LMG 22709       | 45.5               | 33.8               | 42.2               |
| <i>Pseudomonas</i> sp. G11 | <i>Pseudomonas asgharzadehiana</i> SWRI132    | 52                 | 33.8               | 47.2               |
| <i>Pseudomonas</i> sp. G11 | <i>Pseudomonas sivasensis</i> P7              | 49.1               | 33.8               | 45                 |
| <i>Pseudomonas</i> sp. G11 | <i>Pseudomonas simiae</i> CCUG 50988          | 52.6               | 33.7               | 47.6               |
| <i>Pseudomonas</i> sp. D3  | <i>Pseudomonas simiae</i> CCUG 50988          | 53.8               | 33.6               | 48.5               |
| <i>Pseudomonas</i> sp. D3  | <i>Pseudomonas asgharzadehiana</i> SWRI132    | 53                 | 33.6               | 47.9               |
| <i>Pseudomonas</i> sp. D3  | <i>Pseudomonas antarctica</i> LMG 22709       | 50.3               | 33.6               | 45.8               |
| <i>Pseudomonas</i> sp. D3  | <i>Pseudomonas sivasensis</i> P7              | 50.2               | 33.3               | 45.6               |
| <i>Pseudomonas</i> sp. D3  | <i>Pseudomonas kitaguniensis</i> MAFF 212408T | 43.3               | 32.5               | 40                 |
| <i>Pseudomonas</i> sp. G11 | <i>Pseudomonas kitaguniensis</i> MAFF 212408T | 39.3               | 32.4               | 36.9               |

**Table S3.** The source of 95 strains of *Pseudomonas*.

| CCTCC No.        | Name*                                                 | Isolated_from      | Country                            |
|------------------|-------------------------------------------------------|--------------------|------------------------------------|
| CCTCC S2012104   | <i>Pseudomonas baetica</i>                            | Soil               | Arctic Ny-Alesund                  |
| CCTCC S2012113   | <i>Pseudomonas reinekei</i>                           | Soil               | Arctic Ny-Alesund                  |
| CCTCC S2012311   | <i>Pseudomonas koreensis</i>                          | Soil               | Arctic Ny-Alesund                  |
| CCTCC S2012564   | <i>Pseudomonas punonensis</i>                         | Soil               | Arctic                             |
| CCTCC S2012668   | <i>Pseudomonas pelagia</i>                            | Soil               | Arctic Ny-Alesund                  |
| CCTCC S2013037   | <i>Pseudomonas cedrina</i>                            | Soil               | Fildes Peninsula, Antarctica       |
| CCTCC S2013231   | <i>Pseudomonas brenneri</i>                           | Soil               | Arctic Ny-Alesund                  |
| CCTCC S2013262   | <i>Pseudomonas extremaustralis</i>                    | Soil               | Arctic Ny-Alesund                  |
| CCTCC S2013472   | <i>Pseudomonas psychrotolerans</i>                    | Feces              | Fildes Peninsula, Antarctica       |
| CCTCC S2013652   | <i>Pseudomonas cedrina</i> subsp.                     | Soil               | Fildes Peninsula, Antarctica       |
| CCTCC S2013668   | <i>Pseudomonas flavescens</i>                         | Soil               | Antarctica                         |
| CCTCC S2013684   | <i>Pseudomonas taeanensis</i>                         | Soil               | Antarctica                         |
| CCTCC S2014069   | <i>Pseudomonas thivervalensis</i>                     | Soil               | Fildes Peninsula, Antarctica       |
| CCTCC S2014099   | <i>Pseudomonas brenneri</i>                           | Soil               | Fildes Peninsula, Antarctica       |
| CCTCC S2014108   | <i>Pseudomonas antarctica</i>                         | Soil               | Fildes Peninsula, Antarctica       |
| CCTCC S2014299   | <i>Pseudomonas syringae</i>                           | Soil               | Fildes Peninsula, Antarctica       |
| CCTCC S2014340   | <i>Pseudomonas brenneri</i>                           | Soil               | Fildes Peninsula, Antarctica       |
| CCTCC S2014342   | <i>Pseudomonas poae</i>                               | Soil               | Fildes Peninsula, Antarctica       |
| CCTCC S2014365   | <i>Pseudomonas baetica</i>                            | Soil               | Fildes Peninsula, Antarctica       |
| CCTCC S2014426   | <i>Pseudomonas syringae</i>                           | Soil               | Fildes Peninsula, Antarctica       |
| CCTCC S2014584   | <i>Pseudomonas avellanae</i>                          | Soil               | Arctic Ny-Alesund                  |
| CCTCC S2014754   | <i>Pseudomonas meridiana</i>                          | Soil               | Arctic Ny-Alesund                  |
| CCTCC S2014863   | <i>Pseudomonas azotoformans</i>                       | Soil               | Fildes Peninsula, Antarctica       |
| CCTCC S2014901   | <i>Pseudomonas protegens</i>                          | Flowers            | Arctic Ny-Alesund                  |
| CCTCC S2014926   | <i>Pseudomonas avellanae</i>                          | Flowers            | Arctic Ny-Alesund                  |
| CCTCC S2015032   | <i>Pseudomonas graminis</i>                           | Soil               | Arctic Longyear                    |
| CCTCC S2015124   | <i>Pseudomonas chlororaphis</i> subsp. <i>piscium</i> | Soil               | Arctic Longyear                    |
| CCTCC S2015145   | <i>Pseudomonas chlororaphis</i> subsp. <i>piscium</i> | Soil               | Arctic Ny-Alesund                  |
| CCTCC AB2015149  | <i>Pseudomonas piscium</i>                            | Soil               | South Shetland Islands, Antarctica |
| CCTCC S2015157   | <i>Pseudomonas ficuserectae</i>                       | Soil               | Arctic Ny-Alesund                  |
| CCTCC S2015203   | <i>Pseudomonas rhizosphaerae</i>                      | Flowers            | Arctic Ny-Alesund                  |
| CCTCC S2015248   | <i>Pseudomonas gessardii</i>                          | Feces              | Antarctica Fildes Peninsula        |
| CCTCC S2015249   | <i>Pseudomonas guineae</i>                            | Feces              | Antarctica Fildes Peninsula        |
| CCTCC S2015252   | <i>Pseudomonas caeni</i>                              | Feces              | Antarctica Fildes Peninsula        |
| CCTCC S2015320   | <i>Pseudomonas salomonii</i>                          | Soil               | South Shetland Islands, Antarctica |
| CCTCC S2015388   | <i>Pseudomonas brenneri</i>                           | Soil               | Arctic Longyear                    |
| CCTCC S2015407   | <i>Pseudomonas frederiksbergensis</i>                 | Soil               | Arctic Longyear                    |
| CCTCC S2015434   | <i>Pseudomonas beteli</i>                             | Reindeer droppings | Arctic Ny-Alesund                  |
| CCTCC S2015441   | <i>Pseudomonas beteli</i>                             | Reindeer droppings | Arctic Ny-Alesund                  |
| CCTCC S2015639   | <i>Pseudomonas meridiana</i>                          | Soil               | South Shetland Islands, Antarctica |
| CCTCC S2015652   | <i>Pseudomonas libanensis</i>                         | Soil               | Arctic Ny-Alesund                  |
| CCTCC S2015847   | <i>Pseudomonas libanensis</i>                         | Soil               | Arctic                             |
| CCTCC AB 2016039 | <i>Pseudomonas fragi</i>                              | Soil               | Arctic                             |
| CCTCC S2016218   | <i>Pseudomonas chlororaphis</i>                       | Moraine            | Arctic Ny-Alesund                  |
| CCTCC S2016494   | <i>Pseudomonas cryoconiti</i>                         | Soil               | Antarctica                         |
| CCTCC S2016531   | <i>Pseudomonas chlororaphis</i> subsp. <i>piscium</i> | Soil               | Antarctica                         |

|                  |                                       |                    |                              |
|------------------|---------------------------------------|--------------------|------------------------------|
| CCTCC S2016797   | <i>Pseudomonas marginalis</i>         | Soil               | Antarctica                   |
| CCTCC S2016804   | <i>Pseudomonas koreensis</i>          | Soil               | Antarctica                   |
| CCTCC S2017030   | <i>Pseudomonas arsenicoxydans</i>     | Soil               | Antarctic Penguin Island     |
| CCTCC S2017091   | <i>Pseudomonas ficuserectae</i>       | Soil               | Fildes Peninsula, Antarctica |
| CCTCC S2017137   | <i>Pseudomonas migulae</i>            | Soil               | Fildes Peninsula, Antarctica |
| CCTCC S2017165   | <i>Pseudomonas frederiksbergensis</i> | Soil               | Fildes Peninsula, Antarctica |
| CCTCC S2017205   | <i>Pseudomonas taetrolens</i>         | Soil               | Fildes Peninsula, Antarctica |
| CCTCC S2017300   | <i>Pseudomonas yamanorum</i>          | Soil               | Fildes Peninsula, Antarctica |
| CCTCC S2017306   | <i>Pseudomonas weihenstephanensis</i> | Soil               | Fildes Peninsula, Antarctica |
| CCTCC S2017310   | <i>Pseudomonas simiae</i>             | Soil               | Fildes Peninsula, Antarctica |
| CCTCC AB 2018326 | <i>Pseudomonas simiae</i>             | Reindeer droppings | Arctic Ny-Alesund            |
| CCTCC AB 2018332 | <i>Pseudomonas</i> sp. D3             | Soil               | Fildes Peninsula, Antarctica |
| CCTCC AB 2018339 | <i>Pseudomonas guineae</i>            | Marine sediments   | Arctic Longyear              |
| CCTCC AB 2018340 | <i>Pseudomonas fluorescens</i>        | Soil               | Fildes Peninsula, Antarctica |
| CCTCC AB 2018344 | <i>Pseudomonas baetica</i>            | Marine sediments   | Arctic Longyear              |
| CCTCC S2019025   | <i>Pseudomonas coronafaciens</i>      | Soil               | Fildes Peninsula, Antarctica |
| CCTCC S2019058   | <i>Pseudomonas frederiksbergensis</i> | Soil               | Fildes Peninsula, Antarctica |
| CCTCC S2019077   | <i>Pseudomonas mandelii</i>           | Soil               | Fildes Peninsula, Antarctica |
| CCTCC S2019263   | <i>Pseudomonas arsenicoxydans</i>     | Soil               | Norway                       |
| CCTCC S2019297   | <i>Pseudomonas frederiksbergensis</i> | Soil               | Arctic                       |
| CCTCC S2019309   | <i>Pseudomonas silesiensis</i>        | Soil               | Arctic                       |
| CCTCC S2019310   | <i>Pseudomonas prosekii</i>           | Soil               | Arctic                       |
| CCTCC S2019316   | <i>Pseudomonas avellanae</i>          | Soil               | Arctic                       |
| CCTCC S2019358   | <i>Pseudomonas guineae</i>            | Glacier            | Arctic Yellow River Station  |
| CCTCC S2019381   | <i>Pseudomonas grimontii</i>          | Nectar             | Arctic Yellow River Station  |
| CCTCC S2019393   | <i>Pseudomonas extremaustralis</i>    | Nectar             | Arctic Yellow River Station  |
| CCTCC S2019471   | <i>Pseudomonas proseki</i>            | Glacier            | Arctic Yellow River Station  |
| CCTCC S2019472   | <i>Pseudomonas simiae</i>             | Glacier            | Arctic Yellow River Station  |
| CCTCC S2019473   | <i>Pseudomonas canadensis</i>         | Glacier            | Arctic Yellow River Station  |
| CCTCC S2020027   | <i>Pseudomonas nabeulensis</i>        | Flowers            | Arctic Yellow River Station  |
| CCTCC S2021003   | <i>Pseudomonas marginalis</i>         | Glacier            | Arctic Yellow River Station  |
| CCTCC S2021058   | <i>Pseudomonas kitaguniensis</i>      | Glacier            | Arctic Yellow River Station  |
| CCTCC S2021174   | <i>Pseudomonas antarctica</i>         | Marine sediments   | Arctic                       |
| CCTCC S2021176   | <i>Pseudomonas spelaei</i>            | Marine sediments   | Arctic                       |
| CCTCC S2021179   | <i>Pseudomonas gessardii</i>          | Marine sediments   | Arctic                       |
| CCTCC S2021183   | <i>Pseudomonas fluorescens</i>        | Marine sediments   | Arctic                       |
| CCTCC S2021184   | <i>Pseudomonas arsenicoxydans</i>     | Marine sediments   | Arctic                       |
| CCTCC S2021189   | <i>Pseudomonas prosekii</i>           | Marine sediments   | Arctic                       |
| CCTCC S2021190   | <i>Pseudomonas migulae</i>            | Marine sediments   | Arctic                       |
| CCTCC S2021192   | <i>Pseudomonas yamanorum</i>          | Marine sediments   | Arctic                       |
| CCTCC S2021193   | <i>Pseudomonas piscium</i>            | Marine sediments   | Arctic                       |
| CCTCC S2022057   | <i>Pseudomonas frederiksbergensis</i> | Soil               | Arctic Svalbard              |
| CCTCC S2022058   | <i>Pseudomonas migulae</i>            | Soil               | Arctic Svalbard              |
| CCTCC S2022059   | <i>Pseudomonas mucoides</i>           | Soil               | Arctic Svalbard              |
| CCTCC S2022060   | <i>Pseudomonas silesiensis</i>        | Soil               | Arctic Svalbard              |
| CCTCC AB2022412  | <i>Pseudomonas</i> sp. G11            | Soil               | Arctic Svalbard              |
| CCTCC S2022062   | <i>Pseudomonas yamanorum</i>          | Soil               | Arctic Svalbard              |
| CCTCC S2019477   | <i>Pseudomonas proseki</i>            | Glacier            | Arctic Yellow River Station  |

\* The species showing the highest 16S rDNA gene sequence similarity

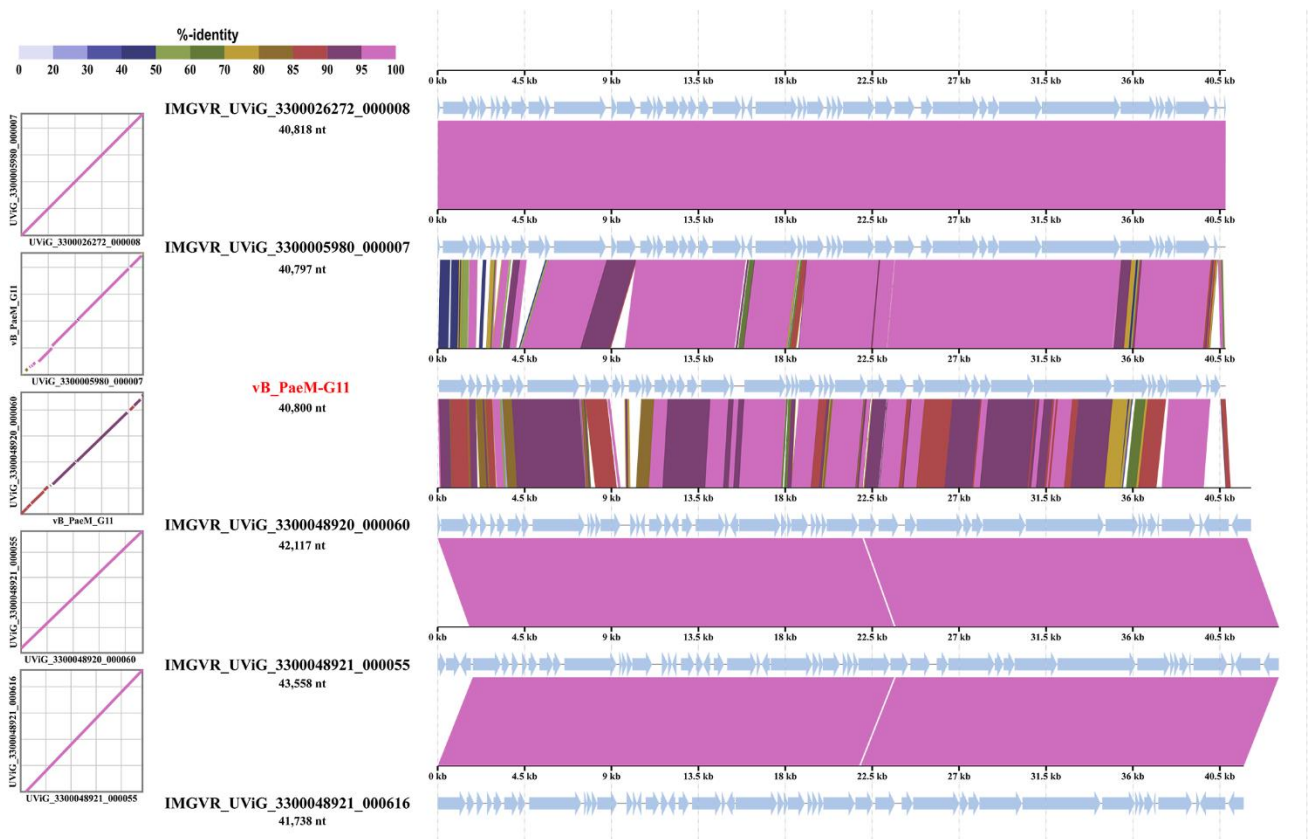

**Figure S1.** Genome comparison between vB\_PaeM-G11 and five UViGs from IMG/VR. In the alignment, high-similarity regions detected by tBLASTx are color-coded based on the reported %-identity. In addition, dot plots summarizing these high-similarity regions are shown beside the alignment.

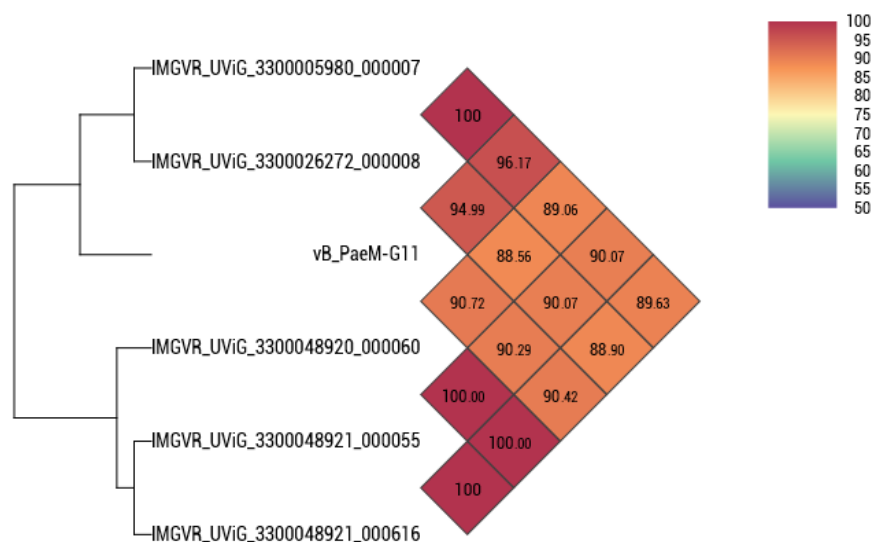

**Figure S2.** Heat map based on OrthoANI values calculated using OAT software about vB\_PaeM-G11 and five UViGs from IMG/VR.

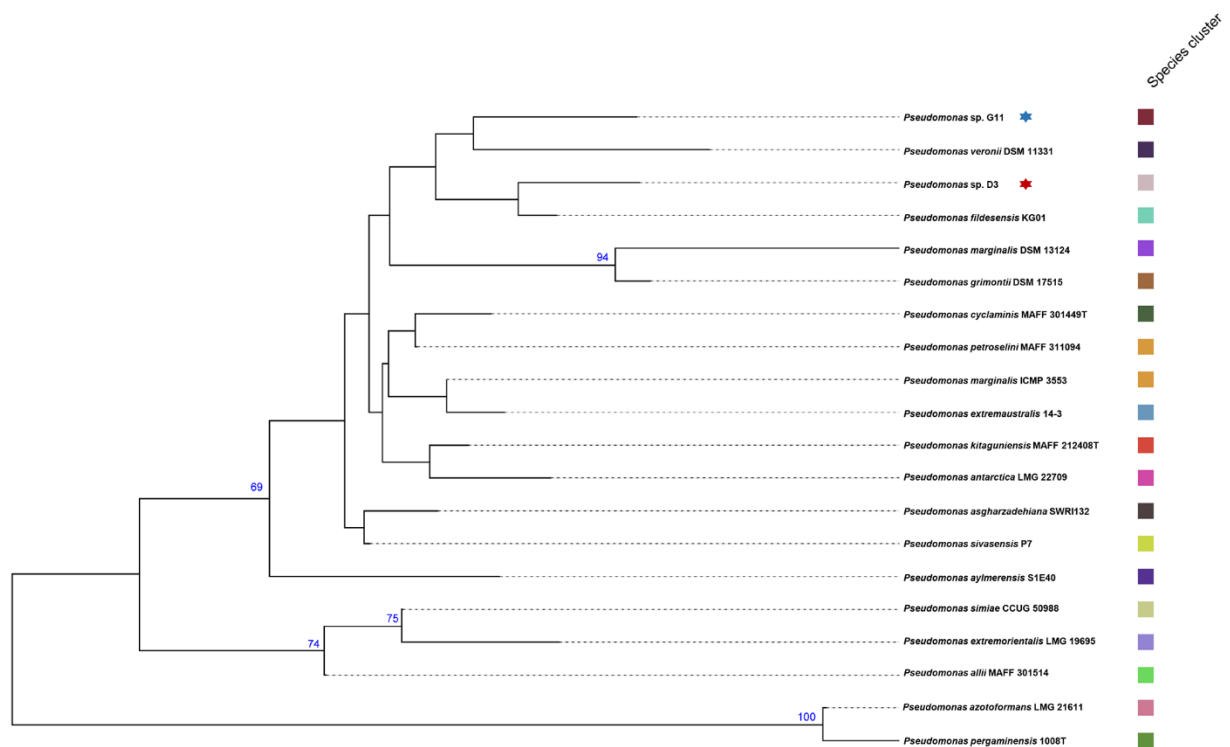

**Figure S3.** The phylogeny tree of GBDP based on 16S rDNA gene sequence of *Pseudomonas* sp. D3 and *pseudomonas* sp. G11. Tree inferred with FastME 2.1.6.1 from GBDP distances calculated from 16S rDNA gene sequences. The branch lengths are scaled in terms of GBDP distance formula d5. The numbers above branches are GBDP pseudo-bootstrap support values > 60 % from 100 replications. The tree was rooted at the midpoint.

## Supplementary Data 1.

### Region 6 DNA

CGTATTCTGTCAGAGAATGCTTAAAGTTGACCACCAATGAGCCCTAAGCCACGCAGCGTAAGGCTCTGACCATGAACAACCCCGCAATCCCTTGA  
AGATTTCTAACAGTTTGTGTAGAGCTTGCCCGTCCTTATCTGTACAGGAGGGAGGGTCGTTATTCCTAAGAGTCCGCGTGAAGGGCTCCAAGGACA  
CCTGTACAATAGCCCTCAAGACAACGAACAGGCACACAGCATTGGCTACAGCAACACGTCTCCTAAGTACCCTTAAGACATTCCACTTGGACCGCC  
TGGACGCTACCAGGGAGGAACTGTGGGAGCGCTACGGGACATCGCTGAGGGAGTCTTAGAGGCTCGCACTGAGTGGAACCCCTCACGGCGGCAT  
GGGGCTTACCTACTCGGACATTAACGACAACCTGAAGGACATTAGCCTCACAGAGCCACTCAATGTTGAGCAGGCCAAGATAGTGCCCTTTGCACA  
GAGGGTCATGTGGGCCGTGAGCGCCGCGCCGAGGGTGACTTCGCGCTATCTTGAAGATACTTGAAGAGATCAAGCGGGAAGCTGGGCATCAGA  
CTATTAGCGTCCCTACAGAGCGTCTGTGGGTGTGCTGAAGCGGCTCCCGAGGTTGTGCAGGACTCTGGCGCACTGACCTTTACGAAGCTCGCTG  
AGCTGCACATGTCTGAGCGCGCTAATGATTGGCAACCGAACCTCAGAAGACCAAGAAGACGGGCTTTAAGACGATTGGCTCACTGCTGGGTGAC  
TTGGACCTGCGCAAGCACACTCGTAAGGACATGACGGACCTCAAAGAACGTCTCATGGATGGTCGCAAGGTATCTACAGCCAACAAGCTGCTGAT  
TGATCTTTCATCGGTTATGACCTGGGCAGAAGATAACGGCTACATCGATAAGAGCTACGACAAGGGCTTACTGATTCTGAAGGGCGCTGAAAGTGA  
GCGTGAGGCATACAGAGCGGATCAAGTGAAGGCCATTATGGAATACGCCAATGGTCTCCCGCTGAACTCCTGGCAGCGCTGGGCGCTCTCTTTGG  
AGTAGTCACAGGGGCTCGTATCGGTGAGCTTCATCAGTTGACCACATCAGATGTCTTCAAAGACGGTGATCAGTTGGTCATTGATGTAAACGAGAA  
CGAGGGTAAGACCCTAAAGAACAAATTTAGCGTCCGACAGGTTCTGTGGTGGATGCGTTGGGCTTCGATGTGGAAGCCTTCGAGAAGTTTGGCC  
AGGACGCCAAGGATCGCTCTTTACGATGTCTCTGAGCAGCTTTTCATCTCTCCTTAACGAGCGCTGCGGGCCATCCTGATGCTTGAATCAAGTAG  
CGGCCAGTCTCTTCATTGCTGCGCCACCACCTTGCGGGGGCCATGAAGGCCGTAGAGGTCAATGAGGGCACAGCTCAGGGTGTATTGGGGCACA  
GCTCAGGAAGTATTACGTTTGACCTCTACGGGTCTGGTAGGAGCGTGCAGGTACAACGTATGGCAGTCGCTATCAAGGTTGCGCTCGAAGAATGCT  
AAAAGGCGTTTGATGTATCATGTGAGGCTTTCTAAAGGGAGCTTCATGTGATGCGCTGTGGTTATGTTGGTGTGCGGGTGCCTGGGTCTTTTGCT  
CCTGGCTGGCTGTGGTAGTCACTCTTCGAATCTCCAAGTCGGAATGAGCAGTCTTACGCGAGCCTAAAGGACCAGCGTGAGGCTGTACGCACCGT  
GAAGGTCTATGAGGCTATGCCTGCTGGTGTGAACCACTGACCACTGTGTCTGCTGGACGGTGCCATAGGAGCTTCGTAGAGGAATCACCTACAGA  
AGCCAGTGTGTGATTGACTTGAAGGTGGCTGCGTATGCTCAAGGCGCTGATGGAATCACAGGCGTAAAGATCACGAAAGAGTCCGGCCTTAACC  
GTAATTGTTGGTACGTCCTGGGAGGAACAGCCCAGGCGTTTACGCTCCGTTCTAAGGATTGATTACAGATGCAATGCCCACTGCCAGAACTCCACAT  
GACATCCGAGCGCCTTACGAACTGGCGCCGTACGTACTCACTCCGACCTGATGCGTACCATCCTCAAGGGGCTCTCAGAGCTTGACAAAGGTG  
GTGTCAATTACGGAAGGGCGGGGCGCTCGGGGTATACTTTGCAGATCAAACGGTGATCGCAGAAGAGTACCCTATGTGGACTCGATGAATCGGG  
AGCGGGTGCCTGAAGTTCGGGTCTGGCTGTGCTGGCACTGGCGCTCAAGGTCTCCCGAGAGGACACGCGTTTGGTTCTCCTTCAGGCCGTT  
AAACGGCACCCGATCTACTGATGTGATTAAAAACCCCACTAAAAAGCGCACTCAAGGAGCCCGGTCAAGTCTCCCATGGATTACCGGGTTTCTT  
TTGTGCAGATAAACGCATTTGGTGTGTTGACATGAACACGTTTGGTGCCTAGATTTATCTCACACCAAGGCGGTCCAGCAGGAAGCCTTAAATAGAT  
AAACACATTATGTGCGATTAATAGGGTTCAGACCATGCAAGCAATCACCATCAAGTACCTGCCAGCTACCAACACCAAGGGCTCCCGCTTCAAGGC  
CACTGCCGCCGCTGGCTCCATACGGTGGGCTATGACTACGGCCTTAACACTGAAGGAAACGTAAAGGCCGCTGTGAGTGCCTTCTCGCCAAGC  
TGGGTTGGACAGCGGCAATGGGTACACCGTAGGTTGGGCTGTAGGCCAGATGCCAAGCGGCGCGTGGGCTGTGTTGCCCTGGACTCCTACTCA  
ACGATTTAACTCAGTAAGCCACAGCCACCTTAAAGATGCCAGGAGGGCAAAAAACCGATGACTATTTACAACCTGACCAACTTCACTTCCGCCGC  
AGTCGCTAACAAGATCCTGGGCGCGATGCAAGACGCCATCAAGACAGGCCTCGCGCAGTACGTGACCAACCGCAATGGCCGCTTGTGGCTTCGTG  
TGGACATCAAGCGGGACGACCACGGGCGCCTCTACTTCCAGTTCCTCACAGACACCATGCAGGAGGTCGGGCACCACCTCTTAAAGGCCGCTCTG  
TTCCACTGGGCCCCTGAGGATGAACGTGAGTTCTCAGGGCTCCACGCCGAGTTGTACCGGCTCCACAGCATCCTCTGGATACCATTCTGGACGCC  
CAGGAAGCGGAGAGGGCGCGCCGAGAATTCTCATGGGGACGTAAGTCGCTGAGTGGATTGGATACCGCTTGAAGTGGCCTGGTATCGCTCTCTG  
ACAGAGGTCTTTTACTAACGTATATGCATCAGTGCATAGAATCTGTTGCGAAAATGCATAATACTGTATGCGCAACCAAGTGTAGGATGGAGAAAC  
CGCATGAACACAGCAGGACAGAACCGTATTGAGTAGGGCTCTCACGGCCTATCCATCTATGGACAAGTACCACACGGACCTTCGGGACGTTCTT  
GACACCATCAAGGACATGCGCGATTACGCTGAGGACCAGCACCCGATAAGCCTGGGGGATTACATCGCGGCGTCAGACTGGGCAGGTGCATTAAG  
CGCGATCACCCATTACGGCTGCGGGGTCTACTCGTTCCCGTACCTCTCTGAGGCGTTCTGTAAGGACCTAATGCTTGAGCTGGATTGCATGGCGTAC  
AGCGTGAACGACGATGAACCAGAAGAGGCGCAGATTCTGAAGTACCTTTCTGACGGAGTGCCGCCCTCTCTTTGATTGCTTGCACAGCCTATGG  
GCAACCGCGGCATCCCTTTGGCAAAGGTTCTGATGGGGCAGGACCCGAGCGTCTCAAGACCATCCAGGCCGCTCAGTACACCGTTGAGAACAC  
CCCAAGAGGTCACTGGCATAACGATAAAGATTGACAGGTGACGTTGGTAGTTGCTCTAACAGCAACCCATACAGGCGGCGGGACGTTAGTTCATAC  
CGGGCCTTTACGCGAAAACATAGTGGTCCCTCAGTTGCCTGTAGGACACGCGATGTTCTTCAACGGGAAAGCGCACAGGCACTACGGGATGCCCG

TAACGAGCGGGGAAAGGAATCTGTTAGTGCATTGGAGTGAAGTTAAATGACACCGCCATTTTTTCGTGCCTGTTAGGAATTGAATGCGTACTTGG  
GCAACACCCAACTAAGGGCGGCTCAAAGGTCAACAGTTACAAGGAGAGTAGCACAGTGACATCATTTGGCAACCCTGTAAGTCGTATTTCGGTTTC  
TCGCACAGGTTCCAAGTTTCCAAGACTTTCGCCGCCGTCAATATGCTTCCAGCACCCAACGCTGTGAGTTCACATTAGGGCTCGGTCATGCGGGC  
GGACTGCAACGCGCCTCGGTTATCAACTGGACAAGGACTTCCTCACGATCCTTCAAGAGTGTGCAGCTCCCGATGAGGGAAAAATCGAAGTCAAG  
AAGTTATCTACTTAGTAAGCGAAATAACTGGTCGGATAGAGGTTGCTTCCGTGTAACGATTTCGCCCTCGGGTTTAAACACCCACTAAAAGCAGCCC  
TGCTGTTCCCAACCCTATGAGCCTTTAACTTAGAGACTTCTTTAAGTCCCCCTAAGGACCCTCTACGCCCTCAATTAGTAAATACCCAACTAACCA  
ACTTCCATAACTTTATTGGAGGCCAAAGTGGCCTCTAAGGGATTCTTGTGTCCGCAGAAAGCCAAACCATCCAATAACCAAGCATGACTTTAGCG  
CAATCACTGATGTTTCATCTGGGCCTATGAGACCCTTCTAATATCTACGGCCCCGACCTTGGCGCGGCTCAGTTAAGTCTTGAGCATGAAGCCTAC  
ACGCTTGGTGAAGATCACTTTAAGAAAGTCCTTGATCGTTCTATTGATCGTAATGAGTTCGCGGACAACGCCACAGCTAAGCCTGTGCTGGCCTCAC  
TGATTCCCTGATGGCTAAGGCTTTCGAAGACTGGGTTGAGCATCAAGTGAATAAGGTGAAGCGAAAGAATATTGGTCTGCCTTATCTGCAATTGGT  
CAAGGCTGAGAACGTCGCGGCAATTACCGTCAAGACAGTTCTTAATATGGTCGCCAAAAAGGGGCCGCTGAGTGTGCAGCAGGTTTCAGTATCCCT  
CGGTAAGGCGGTTGAGGAAGAGGCCAGATTGGCCGTATCCGCGAGCAGGAGGCGGAACACTTCAACAAGCGTATCCGCCAGCACTCAACAAG  
CGCAACGGCCACACCTACAAAGTTAAGTTCATGGAGAAGGTTCGAGGCTCACATGATGGCCGCTAATGAGCTGACCACTAAGTGGACCTCTGGGA  
CTCACTGGACAACCTACGTCACCTTTCATATTGGCGTGAAGCTCCTGGAGCTGCTCATTGAGTCGACTCAGTTGGTCGAGATGAAGCGGGAAACACGC  
AGGCAACGCAAAGTTAGACGGCGAGTTCATCTACCTAACCCCTGAGTGGGCCGAAAAGCTATGCAACCGTGCATATGCACTGGCCGAGATTACTCC  
GCGTTACCAACCAATGATCGTACCGCCACGCGAGTGGACTGGAATGATTGGTGGTGGTTACTGGGCGAAGGGCCGTAAGCCTGTGCCGTTGATTG  
GGTCCGCTCAAAGAAGGCTCTACAGCGCTACAAGGACGTGTCGATGCCGAGGTCTACAAGGCCGTGAACATCGCCAGGCGTCCGCGTGGAAG  
GTGAACGCAAAGGTCCTCGAAGTCGCCAAGGAGGTGATGCAGTGGAAGCATGTTCCAATCGACAAGTTTCTACAGCCGACAAGGAAGCCTTACC  
GGTCAAGCCTGCGAACATTGACGAAGACCCCGAGGTCTCAAGGTCTGGAAGAAAGCCGCTTCGACTGTGTACCGCAAGGACCGGGCCCGAGTG  
AGCCCGCTGTGTCTATGAGTTCATCTTAGAGCAAGCCACAAGTTTCTCTGAATACGAGGCCATTACTTCCCGTACAACCTCGACTGGCGGGGC  
CGTGTTTACGCCATCCCATCGTTCAATCCACAAGGCAACGACCTGACCAAGGGCCTCTGATGGCTTCCATTGCGGAGCCTGTAGGCAAGGACGGT  
ATTGAGTGGCTGAAGATCCACGGGGCCAACTGTGCAGGGGTCGATAAGGTGCACTTTGGGCAGCGCACGAAGTGGGTAGAGGACAACGAAGAGC  
TGATCCTTGAGATTGCTCGGGACCCACTGGGCCAGCCTGAGTGGACCAAGATGGATAGCCCTTCTGTCTCTGGCGTTCTGCTTCGAGTGGGCCG  
GTGTGGTTGAACACGGTGAGCTGTGGGAGTCGGCACTGCCTATCGCATTGATGGGTCTTGTCTGTTGATTACGACTTCTCCGCGATGCTCAGAG  
ACGAGCGGGGCGGTGCTGTGTAAGTGTGCTTGGCTTCGATGAGGTGCAGGACATCTACCGCTTGGTTGCTGAGGAAGTCATTGAGCGGTCAAA  
CGGGACATGCTTGAAGGCACGGAAGACAGCACCGAAGTGGTGACGAACAAGAAGACCGGTGAGATTACAGAACGCCGCGTGTGGGTACTCGCT  
CAATGGCCGCTGGTTGGATGGGCTACGGGATCAGCCGGAAGGTGACTAAGCGTTCGTAATGACTCTGGCGTATGGCTCCAAGGCTTTTGGGTTCA  
CCGACCAAGTACGCGAAGACATCATCCAACAGCTCTTGACGCTGGTGACGGTGAACAGTGGTTCCCTGATGCACAGCAATGTGCCGGTATATGG  
CGAACCTCATTGGGATTCTGTGAGCTTGGTCGTAGTTAAGGCCGTTGAGGCCATGTTGTGGCTCCAAAAGGCTGCAAAGCTGCTGGCTACTGAAG  
TGACCGCCACAAGAAGACCAAGAAGAACCCCGAGCCCGAAATCTGAAGCCTTGATGCTGTGACTGGGTGACGCTGACGGGTTCCCTGTG  
TGGCAGGAATACATGGTGCTGTGCAACGCCGGGTCGACCTGATCTTCTGGGTGCTGCTCGCTTGGCTCAACGATCAATGTTCCGGATTCCAAC  
GAAATCGACGGGGCCAAACAGGAATCGGGTATCTCTCCGAACCTCGTACACAGTCAGGATGGGTCCACCTGCGCAAGACAGTCGTTAAGGCTTC  
CGAGTGCTACGGCGTGGAGTTCTTCGCGTTGATTACGACAGCTTCGGGACCATCCAGCGAAGGCCGAGCGATGTTACAGGGCTGTGCGCGAAG  
CGATGGTTGAGACGTACACAGAGAACGATGTCTTGAGGACTTCCGTCAGCAGTTCATGGAGCAACTGCACGAGAGCCAGCTTGAAAAGATGCCG  
CCGATTCCACAGAAGGGGACCCCTTGACATCACAAGATCCTTGAGAGCCAGTTGCTTGGCTTGGCTAATTGGCTTACTACTCGGTACCGGATTAAAAA  
CACCCACTAAAAGCACAAAGAAACCTCATTGAGATTTAACCGGTCTCTCTGAGGTTTTTCTTGTCTGTGCGATTTAAAAACCCCACTAAAAGCAC  
CACAAACCTTCCCAATATTTAGGAGTTCTTCCGCTATGCAATCCACTAAGACAATTGAACGCAACACCCGCACTTCCAAGCGCCGCACTGATGAC  
GAGATGGAAGCTGTACGGGTCCGTCGCGGCAAGTTGAATAAAGTGCAGCGCAAGCCCGCCATAACTGGGAGAGCGCAGAATGATCAACGTAAA  
GACCTCCTATTCGGCTCTCGATAAGAAGACCTTTTGTTCGACACAACGTTGACTATTGAGGATGCGTCTAAGACTACCCGGCAATTGGTAGATAAG  
CGCGAATTGCGCTCCCTTCGTTTCATTACGGCAACTACGGACGCAAAGCGCTGCTATCAGTACGCGAAGTTTCTCAACGACACCGTAGAGATGCCA  
GTGCGCCGAGCGTTGCAACGACCTTACGAAAGTCCAAATGCTGACCGGCAAGGAAGCTAATTAATGAGCAAGGTTCAAAGTGAATCCTCGAA  
ACCAGCCCGCACCGACAGTCAACTTCAATACGAAAGCCGTCATAAGGTTCTTGATGAGACCTATTTGATTGCTGATGTTAAAGAGGATGGTGTG  
CGTTTGAACCTTTGTGTTGAGCCTTTTGGTTCTGTGCATCGAGTCCATTGGTTGAGCCGGGAAGGTAAAGAGTTTCTGCGTTTAAATGATCAGCTTC  
CTTAGCTCTTGACCTCGTTGGTCAAAGTTCTTCGAGTTAGACGAGGCTTGTCTCTGAAGGGTTCATGCTGGACGCTGAGCTGCGTATTGATGA



CCTACCGTGTAAGACATCGCCGGGACTCTTCGCCGTCACCAGCCTATCGACCTGAGTCGCCTGAAAGTAATCGTGTTCCGGCATTGTGCCAATGTCT  
GTGGTCCGTTCCGGGCCAAGACTATGACGTGACCCACAGTGTCATGAAGTACCACATTGAGTACCAAGTGAAGTTGCTGCAAGAGCGCTTCCCTGA  
GATTGCTTGGTCGGTTATTGAGTCCATGGACTGCTTCAGCATGCAAGAGGTTGACGCTTTTATGAGTCCGTCCGTGAGCGGAAGTTAGAAGGTGT  
GGTGCTTAAAGACCCTAACGGTATCTGGAAGCGCTCTAAGCAATCCGGTATGTGGAAGATGGTTCCCGATGACAACGAAGACGGAAAGGTTGTGG  
GTCTCGTTTGGGGCACTCCTGGGCTGGCTAATGAAGGAAAGGTGATTGGCTTCGAGGTTCTCCTTGAATCCGGCCATGTTGTGAATGCCTGCAAGA  
TCAGCAAGGCACTTATGGAAGAGTTACGGCCAAGGTTAAGGAACATCAAGAGGAACGCTCGTATACCGACTACCTGAACCCCTACCACGGCCAC  
ACAGTCCGCGTCACGTTTCATGGAGCGATATCCGGACGTTCTTTGCGTCACCCATCTTTTCGATTCTTTCCGTGGCATCTCTGAGCCAACATTAAGG  
AGTAACCAATGAAGTCAGCTCTTATTGTTTTCGGCGTGGTTTCGGTAATCGGTCTCGCAGCTTGGTACGAAGTAACACTTTGGCAGGAGTGCCGTGT  
AGATCACTCGTGGTTCTACTGTCTCCGTGTCTCTCTCATTAAAGGAGTAATGCATGACCCCTTCTGCAACTGTTTTTCCCTATCGTCACCGCCGCCCTT  
TCCGTGGCCTGCTTCGCTGTGGAAGAACTAACAAACCCTTCGTGAGAAGGCTAAGGAAGAGGCGCGCATAGTTGCCGAAAAGGCCGCTAAGG  
AAGTCGCTGAGGGGCGGAGAAAGGATCGCCGCAACAACCTTCGGAAGGAACGTGTATAGCGACCTGAACAGATCATTGCGACCCCTGACATGTTG  
GTAGACCGTCGATACGGCCACCGTGAGCCGCTGGGGCACTATCGCTGGAAGAATCTTGCTGAGTTCATTCTGAGAGTCAATCGCCTCAAGGATCAA  
AGCGAACTATTGCGTACCTTGACCAGAGAATCTTAAAGCAATCTGCTCTGATACGGGACATGCAGTTGAATCAGCGGGACATCATGAAGGCTCTG  
CAAATGGGCAACCCAGTGGAGTAATAATGGAAGAGCACGAAAAGTTTATTCTGTAACATCTTGTGGCTTTACAGCGTGAGTACATGGAGCGGGC  
TAAGCCTTGGGTGGACCAGTTGGTTCAGATAGAAAGCATGAAGCCTGTCCGTTACCTGCTCACTCTTGAAACAAGCTGCTGCAATGGGGATTACCC  
GAACTCTAATAATTCTCTAAACCATAATTAATGGAGGACTCCTATGTCTCGTCCACGCCTGCGTTTCGCCTATCGTTTGGCGCAGTCCGCAAATGAT  
CGTGATATAACGTCGCACTATTTACTTCTCAGCGCTCCCAACGCCATACATCGACACCGAAGCCTAAAGAGGCTCTGTGGGTTCGCATAAAGAATC  
GTCTGTTGGACATCTGGCAGAAAGTAAAGGAATACGTGAATGACTGACCTCCTGTGTCTTAACAGTATTTCGAGGGAAGTCCGGTAAGGATACTTTG  
ATTAGTCTGTTGGAATCTGAGGGCCGCAAAGTTTTTCGTGTGGCTTTTGCGGATGTCTTAAACGAATGTGCGCCGAAGAACTGGCCGGTCGCCGT  
AAAGGGCTGGCGGTCATGTTGAACGTGACATGCACAGTTCTGCTAAGGACAAGCCGTGCCAGGTATGGCCATCGAAGAGCTGGAGCGTTCCGC  
TTATACGGATTTCCTGAAGTCCCGTATGGAGAGTCGTGAAGACTTTCAAAGCCTCGCTCTTTACGCTGGCACTTGACAGACCTTCGGGACTCAATAC  
CACCGTGAGTTCCTCGGTAAGCCTAACGTCTGGTTTACTTGGGCATGATCGAAGTTCGCAAGGCACTCGAAGTCGGTACTTACGACCATGTTGTG  
GTTACTGACATGCGAATGATCAACGAATACGAAGGGGTGCTTATGCGCCTTCGGTTAAGACAATCCGAATAGTCCGCGATTGGTTTCATTCCAGGCG  
TAGACGATCAGCCTTATCAGTCTCCGACATTGCACTAATGGCCATCCCTTCGACGCCCTTGTGGTGAATCGACTGGGCGAGCCGTGGGCGATGTT  
GGATCAACTCAAAGAACAAGGAGTAATCAAATAGTGGAACCTTGCGCATAAGACCTTTAAGGCAACAGTAGAAATTGACGATCAGTAGACGAAGT  
AACTATCTACGCGGTACAGTATGGACGCTGCATGGGCATCTGCTGAGGCCCCGTTTTAGCAGTGGTGCCCGTGTAACCTCGTATCCGTCTATGGTCGCT  
CCGAATGTGGATCGCTTTGGGGTGACTCTGTGAACCTCTCACAGGGCAACGGTCGGGCAAAGCCTGACGGCTTCTGCACCTGAACAACCTTCAGC  
CATGTCCGGCAGTCGGGCCTTGTGGTGTCTCTATGAACGCCTAATGACCGTAAAGCAACAGGAGCTGGTCGAGCTGACTTTGTTGGAGCTTGCG  
GGTGCCGAAAGTCATGCACACTTCAGACATGACGTATGGAGATTCAAAAAGTCGTTCTTGAAGGAACACTTTGTCCATGTGGTCTATTCCGTATATC  
GCTCGGTGCGTAAGTCGCCAGCACAAAGAAATCTCCATGGCTATTAGTCGTGAAGAACTGCAAAGCGAATCCCGCAAGGTATTCAACCGAGCTTCT  
CGTAAGTTTTAAACACCCACTTAAAGCACACGGAATTCACCTTGAGACTTAAATGTCTTGAGCGGACTCCTGCGCCTTCAATTACAGACACAACAA  
GGAGACCCATAACTATGGCAGGTCCACGTAAAGAAATCTCACCACTCCTAAAGGGATCGCGGAACCGTACTGCGCCCTTCAAAGCCGGACTAC  
GGCAATCCAGAAAAGGGCTTCGGCAATCCCGTGGTCTCTGGAAGGTTGACCACACCGTTCTTCCCGTGAGGCTCAGCCCTGATCGACAAGAT  
CGTTCAGGCGCACGAAGCCAACATAAGAAGCTCTTGCCGGAACACGAAAAGAACCACAGCGGTTCTCGCGGTAAAGAACCTCTGCTGCCCT  
ACGAGGGCGATATGCCTTTCGTGGATAACGGCGACGGCACTGTGACCTTCAAGATCAAGGGTTACGCCTCGTACATCGACAAGAACACCCAGGAG  
AACAAAGCGATTCCCCTGAAGGTGGTCGATTCCAAAGGTAAGCGCATCGACAACGTACCGGCCATTGCTGGCGGCTCTGAGTTGAAAGTGAAGTT  
CACTCTGTTCCCGTATGGCTGGACCGCTGTGGCCGCTGCTTCCGTGAAGCTGCAAATCGACAGTGTAAATGCTGCTGAACCTGAAAGAGTTTCGAGGG  
CGGCAACGACTGGGCTGATGATGTGGAAGAGGGCGGCTACTCCGCTGATGATTCCGGCGAATGGGAAGAGGGCGAAGAGTCCGGCTCTCGCGGT  
CACGCTGACGAGGAAATCCCAGACAACGACGGCGACTTCTAACCGTGCCGCTATTAGGCCGCTACGCCGGACCCGAAGGGCTGCAAGTTCCTTT  
CGGTACAGTCTGGAAGAGAAGAATAGCGAACTGATGGACAAGCACGGTATCCCTTACACCTTTGAGCAGCATTTGGATTAACACGATCCCTGCA  
CGAGTCGTAAGTATCTCCCGACTTCATCCTGGGGAACGGCATCATATTGAGTGTAAGGGCATATGGGAAGTTGAAGACCGCAAAAAGCATCTG  
CTACTGCGAGAACAAATATCCTCAGCTTGATATCGATTGGTCTTCTCATCGAGCAAGGCGAAGCTCTATAAGGGCTCACCCACAACCTACGGGGCGT  
GGTGTGAGAAACAAATATTCAATTGCGAGACAAGCTGGTCCCCTGGGCTTGATGAAGGAGAAGAAAAAGCAGATTCTGACGGAATTCTGAAA  
GAGAAAGGAGCGTAATAATGGCTCGTGTCCAATTCAAACAGCGGGAGGTGACAAACCTTATCGTTCTTCATTGCGCGGCTACACGTCCTTCTATG

GACATTGGCTTGCGTGAGATTTCGTACGTGGCATGTACAGCAAGGCTGGCTTGACGTTGGCTATCACTACATCATCCGTAGAGATGGCACCGTGGA  
ATCGGCCGTCCTCACGATGTCGTAGGGTCCCACGTAAAGGGCACAACCTCAGAGTCTGTTGGAGTGTGTCTTGTAGGAGGCGTTGACGACAAGTT  
GAAGCCTCAGAACAACTTCACGGATGCTCAATGGAAAGCCCTGGACCTTTTGGTATGGGAAACCCCTGTGCCGTGTATCCGAACGCCACTCTTAA  
AGGCCATAGAGACCTCGACTCTGGCAAAGCCTGCCCCTCTTTGACGTGGCTGAATGGGCATTAAAGAGAACCCCTGCGTAATACCCATCAAGCAA  
CTGTAAGGCGGGCCTAATGGGTTTCGCTTAAACAGCAATTTACCTCTTAACCTTAGGAGGATTACTTATGTCTGTTAATCGGGCAACTATGCAAGGGG  
CTTTTGACCTATGTGAATTGTTCCAGAAAGAAGGCGTCCCCAGCATTATCGCAGGTGGTGCAGCCCGTGATATTTACTTTGGGGTCACTCCTAAAGA  
TGTCGACGTGATTATCTGCTGCGATGACAACTGTATGCCTCATCGCTTCTTGAAAAGGCAGGGGTCGCGCACTCTGTCATTCACTTCTACAACGAG  
TCTTCTCCGATCGAATCATCGGTGTCTTCAAGATCGAAGGCACGAACATCGATGTTTGCCTTTACGACTGCACTGATGTCGGCGAAGCGGTTGACG  
CTTTGACTTCAACCTGAACCAGTTCGTTATCTCAGGGATTATCATCGGGATCGACGGGGCACATGTTCTGTTTGTGGGCAGACCCACTGGTCCA  
CTTTGGCGGTGTCCGTAAAGACTACTCGCTGAAGCGCTGGAGAAGATGCAGGCCAAGTTTGTGGACCTCCGAATCGTAGGGCAACCGGGGAA  
GCCCTGGAGGTTCTGTAGGCGGTGTTAATGGACCGTTCTGAGGACCTACCGGAAAGCGAACTGTCTACAAAGGTCCTTGACGAAACGTTGAAG  
AGTGTTTATCCAGCGATGGCATGGCGACTTACTCAGACGGCCATACCTTTTGCTTCGTGTGCAATCACCACACCCAGGCGATGGCTCAGAGGGTC  
ACAGGACCCGAGCGAACACCTTGCGTGCCAACGGCACAATGGCGATGGGAGAACACCAAGGCCGCTTTCAGGATTGCGCTAAGCGTGCCCTGCA  
ACAGGCCATCTGCAAACAGTACGGATACTGGGTAGGCAAGACCCACAGTGGCAAGAACATTCAAGTCGTGACTACCGTGACGAACATGGGAACT  
TGGTAGGTCAGAAGGTCCGCGATGCAGACAAGAACTTCTCATCTACGGGAAGCATGGAGCTGACTGCCTCTTCGGCAAGCATCTGTGGTCTGGA  
GGCAAGAAGATCATCATCACGGAAGGTGAGATTGACTGTCTGACCGTGGCCCAATTGCAGGGCGGGAAGTATCCCGTGGTGTCCCTTCTACAGGC  
GCTCCGAGTGCCCGTAAGGCCTGCGCTAAGAACTACGAGTATCTCGATACGTTTCGACGAAATCATCCTCATGTTTGACATGGATGACGTTGGCCGTG  
CAGCGGCAATGGATGCTGCTGAGGTTCTGCCAGCGGGCAAGGTGAAGATCGCCGTACTGCCCATGAAAGACCCGAACGAATGCGTTATGAACGGC  
CAAGCGAAAGCCATCATGGATGCAATGTGGAACGCCGCGCCTTTCTGTTCCCGATGGCGTGGTCTCCGCGAAGTCCCTGAAGTCCCGCATTAAAGAAC  
AAGCAAGACATCCCGAGGATTCCCTTGCGGGGTCTGCTGAAGTGCGCCGTATGACCAAGGATGCACGGGCCGTGAGCTGCTTATGGTGACTTCC  
GGGTACGGCATGGGTAAGTCCACCTTTGTGCGCCAGAACGTCTATAGCTGGTTCCAGCAACACGGCCTCGAAGTAGGCGTTGCGATGCTTGAAGA  
GTCCGTTGAGGAAACCGTTGAGGACCTCGTGGGCTTGACATGCGCCGTGCTATCGACAGAACCCTGACGGCACCCACAGAGGAAGAGTTTGAC  
GCTGCCTTTGACGCCATCTTTGAGACGGACAAGCTGTTTCTCTATGACTCCTTTGCGGAATCCGTAGAAGACCGCTTGATGTCCAAGCTGCACTTTA  
TGGTGAAGGGGCAGGGCTGCAAGGTGATCGTGTGGACCACATCTCTATCGTGGTTTCGGGCATGGATGACAACGGCGACGAGCGGAAGACCATT  
GACCGCTTGATGACCAAGCTGAAGACCTTCGCCAAAACCAACGACATCCTCATGGTCTGTTATCTGCCACCTGAAGAACCCCGAGAAAGGGAAGGC  
CCACGAAGAAGGCCGTACAGTTTCCATTACGGACCTTCGCGGTTCCGGCTCTCTACGTCAGCTCAGCGACACCATCATTTGCCATGGAGCGTAACCA  
GCAAGGGGACAACCCGAACGTGGTCACGATCAGGGTCTGAAGTGCCGCTTACGGGTGACACAGGTGTGGCCGGATATCTGGTTTACAACAAGG  
AAACCGGGTGGTTGGACGAGATGCCGATGGCTGGAAACCGGACAGTGATGACGACTGGAAGGACGACATACCGAAAGAACCAAAACCCGACTT  
TTAACCCTCAAGGAGAAACCTATGACCATTATCAAACGTACAAATTCGCTCTGAAGAACTGGCCGCTGCAATGACCAAGGCCGCAAACGCC  
AAGAAGGCTCAAGCCGACTTCTCGTTAAGGCCAGCGCAAAGGCGGCTGCTGAAGCCCTCGAAGCTGCCAAGGAGAGTAAGCGCCTGACTGAAG  
AAGCCGCCAAGGTTTCCGCTCTGATCTAAGAGTGACTCAAGGGTCTCCGCTTTGGGGACCCCTTCGTTCAACCTTAATTGCAACACCCAACCAAGTCA  
CCAATTCCTTTGGAGGATTCACTGTGGACAATCAAAAAGTACGCGCCACCTGCGCAAAGGTGAAATTGCTGTAAAGCTGCTGGAATCGTGGGTT  
ACTCCTACGACGAATCGAAAGTCCACCTTCAGCGAGAGCCTCGTTGGGTGCGCCCGGCGAAGAGTGAGCTGGAGTTGTTCAAAGAGCAGCTTCAC  
GAGCTTCTTACGCCTCTGAGAAGCGCACCAAGTCTGTACGTGATGGGGCTTCGTTCACTGTGACTTCCCTGCCTCTGGGCACTACCTGAACGCA  
TACATGTATCGCCGGTATGTGTTCTCCGTAGAGTCTCGGAATGGATCGCGCCGGGTTCTGAAAAATCCGAAAAGTTGAAGGGGTTTCCGGCTGG  
GCAGTTCACTTTGAGATGCGCGGTACGGCCCGTAAGCAAGGCCTGTGGTTGCCGCTGAGCTGCATCAAGGTAACGCCTAATGCTGACTTCTGACAT  
TGAGACAGACGGGCTCCTTGAGAACGTGACGAAGTTTCACTGTGGGGTCAGCAAGGATTATTTCACTGGTGAGGTCTTCGAGTTCGGCCCTGACC  
AGCTCAAGGAATACATCGCCAGCTCGAAGCGGAAGCGGCCAAACCGATGGCCTTGTTGGTCTTCCATAACGGGATCAAATACGACATCCCGGTCC  
TCGACAAGCTGAAGCGTCAGTACTTCGGTAAACGCCTCAACATCCCCGCAAGAAGGTCATGGACACCCTTGTCTGTCCCGACTGATCCACGCG  
AATCTTAGAGACACAGACGGTGGCCTTCTGCGTACTGGGCGACTCCAGGCAATCGCTTTGGGTGCGATGCGTTGGAAGCCTGGGGTTATCGCTTA  
GGCGAGATGAAAGGGGAATACACGACCGACTTTAAGGCCAGTGCCTTGACATGGCACCGTTTACACGCCGGGTCTCGAATGGAAGAACTGGTC  
AAAGGCCATGCAGGACTACTGCGTTCAGGACGTTGTAGTCACGACCAAGCTCGTTACCAAGTTGATGTGACACCCGTACTACTTCCCCAGTGGGCT  
TGCTCCTAATGGCGAACACTGGATGCAGTCAATCCGTGCGGTTACCTTGAGCATGACACTGCGTGGACTCTGGCTCAGATGGAGCGCAACGGTTT  
CCCGTTCGACTCTGACGGGGCTGAAAGGCTCTACGCTGATCTTGACAGGCCAGCGCTCTGACCTCTTGGTGAAGCTCATTAAGACGTTTGGCTCTTG

GTATCAACCCAAGGGCGGCAATGAGCTGTTTCGTAAACCCCAAGACAGGTAAGGCCATTGAGAAGTGGTCTGACGGTCGCCCAATGCCTCGGGTCA  
AGTACCCAAAGGTCGGCGGTGTTTACCTCAAGGACGGCAAGAAGAAGGACACACGGGAGACCTTTGCGGGTGCCCCATACACGCCTGTCGAGTT  
CGTAACGTTCAATCCGGCATCCGGCGCGCACCTAATCAAGGTCCTCAAAGACGCCGGATGGGAACCGACTGAGTTACAGACAAGGGCGCCCCAA  
AGGTTGACGACGAGACCCTTGAAGGCGTGACCGTTGCTGACTCGGACGCCCAAGCCTGCATCGCCCTGGTGCGTGACTACCTGATGATCCAAAAG  
AGAATCGGGATGTTGGCCGAAGGTGATAACGCATGGATGCGACTGGTCCATTGGACGGCTCAATGCACGGCTCTATCAACCCCAACGGGGCTGTA  
ACAGGTCGAGCAACTCACAGCTACCCGAACATGGGCCAGGTCCCCAGCGCCAAGAGTCCTTATGGGCCGGAATGTCGTGCCTTGTTTGGTGCGGT  
CTTCGCTCAGAAACGCTTTAAGGGCTGGGAGAACTGCGTGACGGTTGGCGTGGATGCTTCCGGTCTTGAGCTGCGTTGCCTGGGGCACTTCGGCG  
CCAAGTTTGACGATGGTGCGTATGCCGATCAGGTGCTTAACGGTGACGTGCATTGGGCTAACGGTGTGGCTGCTGGCATCTGTCAAGCGACCATCC  
GCGACAAGTCCAATCACGACCACGACCGTTGGCGGGACATGGCGAAGACCTTTATCTATGCGTTTCTGTATGGAGCGGGTGACGCCAAGATCGGAT  
CAATCGTTGGGGGCGGTGCGAAACGCGGTAAAGAGCTGAAGAAAGCCTTCTTGAAGGTACGCCCGTTATCAAGTCTCTCCGCGAAGCCCTTGAA  
GAATCCCTAATCTCAGACCAGAAGTGAACCAAGCCCTTCGCAAGTTTGACATCAAGTGAAGCGCCGTTGGATTAAAGGTCTGGATGGCCGAAA  
GATTCACGTCCGCTCACCTCACAGTGCCCTAAACACGCTCCTTCAGTCGGCCGGCGCGCTCATCTGCAAGGCGTGGGTGCTGGAAACCGAAAGGC  
TCCTTATGGAAGAACACGGCCTTGTCACGGATGGGACGGCGACTTCTGCTTCATGGCATGGGTCCACGACGAATTCGAGATTGCTGCACGTACCC  
AAGAGATTGGGGAAGTCTGTGTGGCCGCTGCTCAGCAAGCTATTCGCAATGTAGGCGAGTCCTTCGGGTTCCGCTGTGTCTCGATACAGAAGGAA  
AGATCGGGCCGACTTGCGCGAATGTCATAACCAATAATCAAGGAGGTCTCTATGGCCGTAACCTCTGAATCTTCAACACACCTTTTCGACCCGTGT  
TGTTTTCCGCACTGAAGAAATTGCATCGCTTCGGGCCAATTGGAACGGTACAACAAGCATCGTCAAGAGTTCGCTAAGCAGCTTCTGGCAATGTC  
CGACGAGGATATGGTGTTCACTCTTTTTAGTGATGCGTTTAAGGATATTCGTCAAGGCATTCTGAGCGAGTTGAAGGATGCGGGTGTAACCTGCGATG  
AGCCCCGTTTACAGACCAAGAAGGTAAAGTAATGGGTGAATACATTCGGATGCTCTACGCAATCAAAAAGGAAGCCCGCACGTTCCATCTGACTTCT  
ACCGAAAGAATGCCACGGCGTCTCTGAGGCAGCATCGCGGGGCCACATCTCGTGTGTGCCACTGACGGACGAAACATGGGCGTCTGGTCGCTG  
ACGACAGCGGGTCAACTGTTCTCTCAAGAAACACGGAGGTGCTGTATGACCCTACCTAATGTTGGTTTTCTCCAATGTACAAGGAGCCAGTTCTGTA  
CAGCTTCAGAGGTGAAGCACTTATAGCTCAGTTGAAGCTGGATAACGAAAGGCTGCGCCGAGAAAACACGCGGTTACGTGAACAAGTCTCTAAC  
GCTGGATGGGAGGCATCCGCACTTCACGCTGCTGTACAGGTGGCTGGCAATGACCGCTCGTATCGGGGTGGCTCTCGACATGGACTTCTGTATCT  
TCGAGGCAATGACCGTAAGCGAGCGGAGCAGGATTGGGGTGATGACATTTGGTCCCTTGAGTGCGACACGCGAAAGCTCGGGGCATCCTGGGC  
GGGACCATTAAGTCCATCTTGGTGACATCGAAGCGGACATCCGCAAGAAGAACAGAAGCCCTTTGAGCTGGTGCCGCTGTGCATCATCTCGGG  
CTCTGACAACCTCCGTAAGGAGGTCTTGCCGACCTACAAAGCGAACCGTAAAGGCAAGCGTAAGCCTGTGGGCTACCCGGCGTTTGTGAGGCCCT  
GCATGCAGCACTACGGTGACAACGCGTTCCGCTGGGATGGCGTTGAGGGTGATGACGTTTGCGGGATATTGATGACTAACCCGGCCCTGGCTGGCT  
GTGTCGCTGTGGTCTCCGCAAGTTGCGACAAGGACTTCAACACGGTCCCCGGTATGTTTCATGTGGCTTACTAAGGGCAAGATGATGCGCAACAGTG  
AAGCCCAGGCGGATCGTTATCACATGTACCAGACCCTCATAGGCGACGTGACAGATGGCTACTCTGGCATTCCCGGTGTAGGTCCTGTGGTCTGTG  
AAGAGTTCTTGATTCCCCGCTGTTCTTCTACGAGGCCTCAAAGGTCATGAAGTCCGGCCACGGAAGGGTGAAGAGGTAACTACTGGGCTTCCC  
GTGCCCCACCGAGACGGAACGCTGTGGGACTGCATGGTCTCGTTAGCTGCATCAAAGGACATGACTGAGGGCTGAGCTTTTGCAACAGGCCAG  
GTCGCTCGAATCTGCGCTGGTCTGACTGGGACCACGAGAACAAGAAGCCGATCTTATGGAAACCGTAGAGGTGTTCTTTACGGGCCTCACTTTTCG  
GCGTGTGCTCGGCGTGTTCCTGATTGACTTTAAAGCACCCACTATAACCATAGGAGACTGAAAGTTTCTGTCTTCTTAAAGGCATCTTTTCGTCTC  
CGATAAGGAGGTGTAACCTTGTGTAAATGATATTCAAGCGGTAATCAGTGATCCTGAAAACATCCCCGATATTCGAATGCTTCCGCGCAATACCT  
TAACGTCCGCTGCAATGCTTCTTATCTAATCCGTACTGGTGTAATTGAGGACCTCCGTAAGGCGGGTACTCCGAGTCATTATTGGCGGGTTCCTTG  
AGGGCATGACTGCTGTCACTGAGATTATCGAATTGATGCAGGAGCAGCGGAACACTCCAACCGAAGAAGACTGACAGGAGGTTCTATGTGCTTCT  
CAGCAAAAGCCAAACAGCCAAAGGTGACCCGTCAACTATCGCTGCCCCAGCCCCGTAATGGAAGAGCCACCTAAAGGTGTCGAGTTTGGTGAT  
GGGAGCGATGGTGATAAGTCGGAACAACCGATGGCATTAAAGACTTGAAGGTCAAAAAGGAAGAGCAGGGTGATGGTACTCCAGCCGCTGCTG  
TCGCAAAAGGACACCGGACTTGCCAAGAAGGCATCTTCAAGTTTCATCCGTTAAACGAGCCCTTAAACGAGGTTAATACTACAAGGAGGAACTAAT  
GGGTTTTTTCAAGAAGGCTTTCAAGAAGGTTTCAAAGTTAACAGGAGGCTTGGTTGGTGGCGGTAGTGATAAGCCTAAAGACCCAGCTCCCGTAG  
CCGTGCTGTTGAGGCGCCAGCTCCCGTAGCCGCTGCTCAAGTCGAAGCTCCTAAAGAGGACACGCAGACTGGCGAAGATGGCGATAGCGAAGC  
AGCAAAACGAGCTGCCAAGGCGAAGGGTAAACGATCCCTTTCCGTATCACGCAGCCAGGGGACCGGTCTGAACATCTAAGGAGGTCTATATGGCC  
TCTACGGCTCGCACAGGGCTTGAGAGAAGAATCGGCGAAGGCAGTCTATGACCGCTTGAAGAATGACCGTGTTCCTACGAGACCCGCGCTGAAAA  
CTGCGCGAAAGTAACAATCCCTCGCTGTTCCCAAAGACCTCGGATAACGCCTCGACTGACTACACCACACCGTGGCAGGCAGTGGGTGCCCGTG  
GTCTTAACAACCTTGTCGCCAAGGTGATGCTCGCTCTGTTCCCGCTGCAAGGCTGGATGAAGTGAAGGTGTCCGAGTGGCAGGCAAAAGCAACTT

GTCACTGACCCTGAGCAACTGGCAATCGTGGATCAAGGCTTGGGTATGGTTGAGCGGATCATGATGTCTTTCATGGAAGCCAACAGCTACCGCGTG  
ACGCTCTTTGAGCTGATCAGACAGTTAGCTCTTGCTGGCAATGGATGCCTTCACCTACCGCAACCGGATGCAAGCTCTACGGGCTACAACCCGATG  
AAGCTCTATCCCTTGAGTTCTATGTGGTTACGCGGACTCCTTCGGGAACGCTTGCAGATTGTACGTTGGACAAGGTGGCCTACGCGGCCCTT  
CCTGAAGATGTCCGTAACCTCCTCTCGGATTCTGGCGACAAAAAGCCCGATGAAGAAGTGAGGTCTACACACACGTTTACCTTGACGATGAGTCA  
GGCGACTTCTTGAGCTATCAGGAAGTGACGGTGAGGAAGTGACGGCACTGATGGGCAATACCCACCCGATGCGGTTCCATGGATCGCTGTGAG  
ATGGACCAAGCGGGACGGTGAACACTATGGCCGTTCCACTGTGAGGAATACCTGGGCGACTTAACGTCCCTGGAGAACCTTCACGAATCCATGAT  
CAAGTTTTCCATGATCGCCTCGAAGATCGTTGGCTTGGTGAACCCTAACGGGATGACCCAAGTACGGCGTCTTACCAAGGCCAAACGGGCGACTT  
CGTAGCAGGCCGGAAGCAGGACATCGAGTTTTTGCAGCTTGAAAAGACTGCTGACTTCTCAGTCGCTAAGTCCGTGGCAGATGCCATTGAGTCCC  
GTCTTGCCTATGTCTTCATGCTGAACTCAGCCGTGCAGCGTTCGGGTGAGCGTGTGACTGCTGAAGAGATTCCGTATGTGGCAAGCGAGCTTGAGG  
ACACTCTTGGCGGGGTCTATTTCGATCCTCTCCCAGGAGCTTCAGTTGCCGCTTGTGCGGATTTTGTGTAACCAGCTTCAAGCCACCTCTCAGATTCC  
CGACATGCCAAAGGAGGCCGTAGAGCCAACTGTAAAGCACCGGCCTGGAAGCACTTGCCGTTGGCGAGGACCTCGACAAGTTGACTCAGTTCTTC  
AATGGTCTGCAAGCGATTGCGCCGCTGATGCAAGACCCTGACATAAACATGAGCAACCTAAAGATTGCCTCGCCAACGCCATTGGCATGGACACC  
GCTGGGCTCCTGCTCACGGACGCGGACAAGGCCAAACGCCAAGCTGAACAGATGGTCGCCAAAGGCGGTACAGGCTGCTGCTCAAGGTCTCGGCG  
CGGGTGTGGCTGCGCAAGCAACCGCAAGCCCGGAAAACATGCAGTCAGCCATGAACACCGCTGGCATTCAAGCGGGCCCTATCGGGGCTGACA  
GAACACCTCAACAATACATTTAAGGAGACCCTATGCGATTCAACATGCTGGCTCTGGCCGTGGGCCACGTTTACCAATCCGCTGACGTCTATGCGTC  
CTTCGGCGTGAATAGCGCTGTGATGTCTTCCAGCGATCCTGCTGAACACGCTCAGAACATGTTGGCCCTGGACGTGGCTACCCGTGACGGCGACAC  
CTCGATTGACCTTTCGGGATGACTCTGAAGAGCAAACCGAAGAGTCCACTGAGGAAGAGGAAGCCAGCGAAGACGAAGAGGGCACCGAAAGTGA  
AGATGAGTCGGACGGCGCTGAGCCCGAACAGGGGGAGGATGGCTTTACGCCCCCTTGGCGATCCTGATGAAGAACTGACCGAAGCCTCTCAGCAG  
CTTGATGAGTACTCCACGGGCTTCGATGAGATGCGCGCCCAGGCAATCAAAGCTGGCCTACCTGCTGACGTAGCGGCCCGCATCGAAGACGAATAT  
GAAGCTGACGGGAAACTCTCGGACGACTCGTATGCGCAGTTGGCTAAAGCTGGCTATTTCGGCTGTTTCGTCAACTCGTTTCATGAAGGGTCAGGA  
AGCTGTAGCAGAAGCCTACGTCTCCAAGATCGTGGCGTATGCAGGTGGCAAGGAACAGTTCGACCGCGTTGTGGCCACCTGAAAGCCAACTCCC  
CGAAGTCCATGGACTCGCTGTATGACGCCATTGAGCGCCGGGACCTGAACACCGTTCAAACCGTAATCAACCTGGGCATGGCAAGTCAGGCAAAG  
AAGTTCGGTAAGCAGCCTGAGCGAACTTTGAACCGCCGTAATGCAACACCTGCGGGCCGTGCCCTGCTCAACAAGCTGAGGGCTTTGTACTCA  
AACCGATATGGTTAAAGCGATGAACGACCCGCGTATGGTCGAGACGCTAAGTACACCCAGGAAGTTCGAAATAAGGTACTTGCCGCTCTTGGA  
AGACCTCCGATTTAAACCCCCACTATAACAGAAAGATACTTTCGGACATCCGTCTGAAGGCCTTTCTGCGCCCGGAGATAACTGAATAAGGAGAG  
CTAATACATGGCAAATGCTAAAGGTCAACAGATTGGTAAGAACCAAGGTAAAGGCGTTACCGATGCGGACAACTGGCTAACTTTCTAAAAGTTTT  
CGGTGGTGAAGTTCTGACTGCTTTCATGCGTCGGGCTGTAACCATGGACAAACATATGGTCCGTACCATTCAAACCGTAAGTCCGCTTCGTCCCCG  
GTAATGGGCGTACTGCCGTTACTACCTTGACGCGGTGAGAACCTGGATGACAAGCGCGGTGACATCAAACACGCCGAGAAAGTTATTACTATC  
GACGGTCTGTTGGCTTCGGATGTTCTGATTTTCGATATTGAAAACGCCATGAACCACTATGACGTTGGTGTGAGTATTGGCTCAACTGGGTGAGG  
CTCTGGCTATCGCTGCGGACGGTGTGTATTGGCTGAGATGGCTAAGCTGTGCAACTTGCCAGCCGCTGCTAACGAGAACATTGAAGGCCCTGGGCA  
CTGCGACCGTTCTGAAGATCGGTTCTAAGGCCACTCTGGAAGCTGACGCCGAGGCACTGGGTAAAGCGATCCTGAAGGCGCTACCCGTTGCCCGT  
GCGAACTGACCCGCAACTATGTGCTGCTCAAGATCGTAAGGTCTACACCAAGCCTGAATACTACAGCGCTATCTTGGCCGATTGCTGCCTAACG  
CTGCCAACTTCTCGGCGCTTACCGATCCTGAAACCGGCAACATCAAGAACGTGATGGGCTTCGAGATCATCGAAGTACCACACCTGACTGAGGGC  
GGTGACGGTATGACCGTCAAGGCACCAACCGTAAGCACGCGTTCCCTGAGACAACTGGCGGTGACGTACAGGTAGCTCTGGATAACGTGGTTCG  
TCTGTTCAACCACCGTTCGGCTGTGGGCACCGTGAAGCTGAAAGATATGGCTCTGGAGCGTGCCCGCCGTCTGAATTCCAGGCTGATCAGATCAT  
TGGTCGCTACGCGATGGGGCACGGTGGCCTGCGTCTGAAGCTGCTGGCGCACTGGTTTTTCACAGCGGCCTGACCTCAGTAACTGGCGTAACGCT  
TAGCCAAGCGACTATGACTCTCCAGATCGGAACTCTAAGTCTCTGACGGCTACCCTGCGCTGCTGAGGCCACTAATACTTCTGTACATGGAA  
GTCCAGCAATGAAGCTGTGGCTACTGTGAGTTCTGCGGGAGTCGTTACGGCCGTTGCTCAAGGAACCGCTGGGATTACATGCACAACTGTAGATGG  
CTCTTTCTCTAAGAGCTGCGCAGTGACTGTGCTGCTGCTTCTTAAACACCTAAAGCCCTCATCCGTTTTCTTAAAGGGTTAGAGGGGCTTTT  
TGTTTCTTGACATACCTTCAGGAGGGCCTAATGGCAAGCCTGAATCATTGAGTCCGACGATGAGCTGTACAGAGTTAATGACATGCTTGCA  
GCTATTGGCGAGTCGCTGTTAGTTCCTGGAAGGGGACCCTAACGCTGATGTGGCTAACTGCCGTGCTTGTCAATCAGGTAAATCGTGAAGTC  
CAGTCTAAAGGCTGGGCTTTCAATATCGAAGAGGATGCAACGTTAACCCTGATACTTTCTCGGGGCTCACTAACTATCTCGGCGATTATCTAAAGAT  
CACCACCGGAACTATTCAAATCGCAGCGGGTTTCTCTACGACCGCACAGCGAAGACCGATGTGTTTACGGCACCCATAACTGTGTCCCTGGTGCG  
CCTTCGGGAATACCAAGAGATGCCTGAGTGTTCGCTCTTACATCGTCGCTAAGGCCTCCCGCGTTCATATTCGGTTCTTTGGGGCCGGTGAG

ATTGAGGGTTCTTTACAGGAGCAGGAGGCAACCGCTGGGCTGAATGCCAGGAGTACGAACCTTGATTATGGTAACTACAACATGCTCGATGGTGAC  
GCATGGACTGGTGGCCGAATCTCCCGTTAATCCCAATAACAAGGAGGTCACCTACATGGGTCTTGTTTCCCAAAGTGTTAAGAACCTTAAAGGAGGT  
ATATCGCAACAGCCGGACATTCTGCGCTTCAGTAACCAAGGTAAGGTACAAATCAATGGATGGTCTTCAGAAACTGAAGGTCTACAGAAGCGCCCA  
CCAACGACCTTTCTGAAGCGCTTAGGTGCTGTGGGTATGTTTGGCGCGAAGCCTCTTATCCACCTCGTGAACCGTGATGCATCCGAACAGTATTTTA  
TGGTGTTACGGGGCAGGGCGTTGAAGTTGCGGACCTCAAAGGGAACCGCTACACCGTCCGGGGCTACAACGGTTATGCCAACTGTGAGCATCCA  
CGGAATGACCTGCGCTTAATCACCGTCGCTGACTACACGTTTCGTTACCAACCGCAACAAGCTGACAGCAATGAAAAGCACGCTGACCCATGCCGA  
CTACGGTTCTATGACGAGGCGCTGTGTAATCAACGTCAGAGGCGGTCAATACGGCCGAACCTGAAGATACACATCAACGATGTCCAGATGGCAAT  
CCTGAAGATGCCCCGTAGGTGACTCTGTGGTGACTACGCCGCCCAAGGTGGAGCAGACGGATGCCGGTTACATCGCTACTCAGATGGCCGCACAGAT  
CAACACTAACGGCGCTTCTCGCGGGATCACCGCACAGGCGGGCCAAGGTTGGATCATTGTGACAGCCGCTGGGAACGACATTAAGACCGTGAAGA  
CCGAGGACGGCTACGCAAACCAACTGCTCAACTCGTTCTATCAGGTCCAGACGTTTCGCCAAGTTGCCCGCTCAGTGCATTGACGGATACCTCG  
TGGAAATCACAGGGGAGGCATCACGTACCGGGGATAACTATTGGGTGCGGTATGACTCAGCGGGCAGGTTTGAAGGAGACCGTTAAGCCAGGG  
ATCATTACCGGGTTTGAGCCAACGTCTATGCCTCATGCCCTGGTCCGAGCGGCTGACGGTCAGTTTACTGGAAAGCCTTAACGTGGCCTGACAGA  
ACCTGTGGGGACGACTTAACGAACCCCATGCCCTCGTTGTAGAGGCGACCATTAACGACATTTCTTCTTCAGGAACCGCTTAGGTTTCTCTCGG  
GTGAAAACGTTGTGATGTCCAGGACCTCGAAGTATTTCAACTTCTTCCCGCCTCTGTGAGCTCCATCAGTGACGACGATCTATTGACGTAGCGAT  
CAGTCACAACCGGGTGAGCATCCTAAAGTACGCCGTACCGTTCTCCGAACAGTTGCTGCTGTGGTCCGATCAGGCTCAGTTCGTTCTGTCTCTCA  
GGGGATCATGTCGACCAAGACGGCCGAGTTGGACCTAACCACAGAGTTCGATGTGAGCGATGGGGCACGGCCTTTTGGGATTGGGCGGGGTGTTT  
ACTTCGCTGCACCGAGAGCGGCCTATACGAGCCTCAAGCGGTACTACGCGGTGCAGGATGTGAGCGACGTTAAGTCAGCAGAAGACATCTCTTCG  
CACGTTCCAAGCTATCTGCAAAACGTGGTCTATACATCCACGGGTCAAGTACTGAGAACTTCGTTTCCGTCCTTTCCGATTCCGAAGAAAACAAG  
GTCTACATCTACAAGTTCCTCTACCTCAAGGAAGAGCTGGTACAGCAGTCTTGGTCACATTGGGAATTCGGTATTACCAACCGGGTCTGGCGGCTG  
ACTGTATTGGTTCGTATATGTACCTGCTGAATGAGCGCGCAGGTGTGCGGATGTGCCGAGAGCGCATCGAGTTCACAGCGGACACCGTGGACTACA  
TGCAGGAGCCTTATAGGGCTACATGGACATGAAGAAGCTGATGACACCTACGCGGTACGACGAGGACCTGAATGAGACCTATGCGAGCCTGAGT  
GACATCTATGGCGGTGTTCTGTATCCCTTTTCAAGTGTCTACACCTGGACCCACAGGGCGTCTTAGAGCGCCACACCTCGGACAACCTGGAACGTG  
GACGACCGGATTAAGTTAGTCGGGAATCGCATGGGCACGACTTTCATCGTTGGTTCATGAGTACGGCTTCAATACGAGTTCCTCAAAGTTCCTCATCA  
AGCAACAGCAGATGACGGTACGACCAATACCGAGGACATCGGGCGTCTTCAAGTACGGCGAGCATGGGTGAACTACGACAATTGGGCGCCTTT  
GAAATCAACGTGAACAATGGGTCCACACAGTTCTGTGACGTAATGGCAGGTGGGCGCCTGGGCACAGAAGCAACTCTTGGCGGGCTCACGTTGGG  
TACAGGGCAATTCAAGTTCAGTACGGGCAACGCCAAGGCTCAAAGCGTAACCTTTTCGTCCTATGCACCAAGTCCCTCTGAACATCATCGGATG  
CGGTTGGGAGGGTAACATACGCGCGGTCAAGTGGCGTGAAGGAGATAACAATAACAAGGAGGAATCTATGCGACTGATCAAGGCCACTGAGG  
CCCCTTAAAGGCTGCTGCTGCTGACCTTTGCGCCTCGGACCTTCAAGAGTTTCACTGTATGAAAGCCGGTAGAGACCCCCGCGATGTTCTCCCGG  
AAGCAATTGATGAACACGCCCAGGCAATCGTCGTGGGCTCCCTGGTCTTGGCAGTAGGCGGGCATAACCGCGTGGGTATCTGGTTCGTGACGACCA  
ATGTGGTCCACATGCTGACCCCAGCCGAACGCTTCCAATTTACCGCTGCTTAAAGCGAACCTTGATCGGGTCAAGCAGCGCTCACCGAGTCCTA  
AAACCAACTGGGTTTCTGTGGACAACCACGCACACATCCGCTTGTGACAAAGCTGGGAGCCTCCTTCAACGAGGGCATCTTTATGTCACCTGCCG  
GATTTGCCTTTAAACAATTCTGGCTATAGGAGGGCGGCGCTATGTGCGAACCCGTAAGCATCGGTCTGGCGGTTGTGCGCGTGGCTGGTGCAGCAA  
TGAGTGCATCGGAAGGGGCCAAGGCTAAGGGCCAGATGACAGACAACGAGCGTAAGTCCCAAAACGAAATCGTGAAGCAAGCGAACTTCGCGG  
AGAACGATCAGAACTTGCAACCGTGGATAAACACGATGAGGCCCGCCGTGAGCTCACTGAGGTGAACCTACAGGCTCTACGGAACCAAGGGAC  
CATCAACGCTGCTGTAGGCGAGTCGGGTCTTGCGGGCAACTCCATGGACCGCATCAAGAACTCTGTAGCCAACGATGCATCGGCCGAGAAGATGA  
ACATCACCGAAAACTACGAGCGGGACTACCAGGCGATCTTTGCGAATCGCGTGGGTAGCTCTGAGAACTCTAAGGCTGCTGTACGTGGTGCAGGT  
GGCAATAACTACAAGGTGAACAACATCGCCAACGCCCTGAATATCGTATCGGCTGGTGGCAGTGCCTATACGGCATCTGTTGGCAAGTTCGGTAAG  
GGCGCTTCAACGACACCAGCGGGAGGTAAGACAGCGTAATGGCTAATGATATTGCACAAGCACTGGGCAATCAGCCCAACAACAGCGGGCCGT  
CAAGGCTTCCGAGCGGGGTCTGGTACAGGCTATCAGGCTGCACGAATCGCTAAGCCCGTCTTGGACACCTCCCTTGGGGATGCCATGCGGAACCTC  
GTGAAAGCTGGTGGGGATTCTTTGCGTCTACGAGCAGAACCGAAAGTCTCAGGCAGACGAGCGCTCAAACGAGATTATCCGAAAGCTGACCCC  
TGAGCAGCGCCGACAGGCAATCGGGGAGGGGACTTTGCTCTATGCAGATGATCCAGACGCTATGCAGCAACTGCGCCTCAAGTCGGGCCGTAACG  
CTGCCTACGAGGTGGATAACGAGGTCCAGACGGAAATCCAGAAGGGGTCTTTCCGATCCCGTAAGGAGCTGGATGAGTGGCGCCAACTCGCATG  
GAGCAGAAGTCCAAGAACTACGCTGAGATGGCAGGTATTGATCCTAATGACACCATGTACCAGCAAGGTTTCAATGCGGACATCACTCAGCGTAAC  
GCTGCCGTCTACGACCTGCACTCACAGTACCTCTCCAAGAACCTTGAGACCCAAGCGGTACTTGAGACCCAAGCTGACCTTCAGCCTATGCTGGAT

GACCCGAAGATCCTGGGGAACCTGCGAGTGCGGAACACTTTGCGAGCTACTTCAATAATAACCTCAAGACCGGCGTGTTCCCGAGTGACGGCCA  
CGCGGTTCAAGGCTCTTCAACGAGTGGCCTCAGCGGCTGTAGAGAAGGACGGCGGCGTGACGCTGCTGGATAACTTGGGAGACAAGACGATCAAC  
GTCTACGGGGGCCAGCGGAAGGTCGCGGACTTGTGGGTCTGAGATGATGGACAACCTGAAGATGAAGGCCGCTAAGTCCACCTACACGCGCAA  
CTCAAAGCGAAACGAAGAGTTGAGCTTGGCCTTGCCAATGCCGTGCATCAAGTGGACCCAGCAGCAGGTTGGCAGGCTCTCAATAAACTTGAGC  
AGGGGAACGATTGGATTACAGCGGGGAGCAGATGACGCCTCAACGTCAAAAGCTGATCGACGCTAAGAAGCAGATGATTGCCAAGGTGGCCCA  
GGACTCACAGGCTGGTCTCTTGAAGTTGCAACAAGCTGCCCAGGCGGACAACCGACAGGCTGTAATCGAATACGCTTACGCGCGGCGAATGAGTC  
AGGAGAACGTGCTGTATCCCCTAAGTTCCTCCCAGTGAATGACAGTACCGGGGAGTTCAAAGAGAGTGACATGGCGACCTATGCAGCCAACAAG  
CTGAATCAGATCAACGCCATGTCCATCCCTGAAGAGAACAAGTCCGCAATGAAGGCTGCATTGCTTCGGGCTGACTACGACAAGGGGCGCTTCA  
AGAGAACTTCAAGACCTCTTAACGGACGCCTCTCGGGAGTGGCAGGGCGCTTTGCTCAACCCTGAGCCGACTGCGGACATGCCTCGCCTGAAGG  
AGCTGCAAGCTGCCTATCAGCAGGACCCTTCAACCATTGCTCAGCTCTTCCCGATCAAGCGGGCCTCCTTGAGAAACTTCGTTATTGGCAGAGT  
CGGGCATCGATCCACAGATTCTGATCGACGCTGAGAAGTCCAAAAAGGCGCTCAGCAAGGACGAATCGAAATTTAGGGATGAGCAGTGGTCTTCC  
GTCAAGAACGACAGCGGATACAAGGAAGTGAAGTTCATCCCTGGACAATTCGAGAGTCAAGCCCGTCAGGTATTGATGCGGTGACATTGCGGTC  
TGGTGATTCCAACGAAGCAGCAAGTCCGCTCTCGGAGTACCTGAAGAAAACCGCTGTGTCAATCACCAGTACAAGGGCACCTTCAGCTCTAACA  
GCTTCCACGGGATGGTCAGTAAACGGGACCTCATGACGGACGTAAACGATGTCACTTCATGGGAGACCGGCAAGTCGATCATCGACGAGACCATG  
CAGAACCTGCGTAAAGACGCCGACTGGGGCGCGGTGGCCTAACCGTCACTGCAACCCAAGGCAACATCATCATCCAGTCCCTTACGGGGCGACG  
ACTCCGACTCAGTAAGGATGCCCTCGGGAACCTTGCGCGGGATCGTGCTGCACAGCAGAAACAAGCGGCCTTCGACAAGAACGTGAAGTCTGCG  
CAGAAAGATCAAGAGCTACACGACCGGTACATCTCGGAGGTGCCCGCAAACAATGACCTGAATAAAGGAGACCTCTATGAGTAACGACTATGAA  
TCTGTGAAGGCCAAGGGGACACCCTACGACGCCATGATTCGACAAGAGGCTGACCGTAATGAAATCCCATACGAGTTTCATGACAAGCTCATCTAC  
AACGAGTCGAGCTTTAACAACAACGCCAAGTCCCTACAGGCCCAAGGGGCTCGGACAGTTCACAGAGTTGACCGGTAAGGCTTACGGCCTGAT  
GACCCTGAAGATCGTATGGACCCACAGAAGGAGTCCCTGCGATTGCCCCCACCTCAAGGACCTCAAAGGCGCTATCAGGGTGACTTGCTGA  
AGGCCGCTTTGGCATAACAACGAAGGACAGGGCGCTTTGGGTCCCCTCAGTTGGCCGCACTGGATCAAGGTGACTTCACCAAGATCAGTCCCGAG  
GGTCAGAACTACATGCGCAAGCTGCTGGACGTGTCCGGTGATTGCGCTTCCCGCAATGGTTCGATGCCCAAGGAGTGACCAATCCCGGTATCAAC  
CCAAAGGCCCAAGCCGTCAGCTTTGAGGATGCTACTCGGGGTGTGACGGCAGGCTCTAAGGTTTCGTGTGGGTGACGGACCTCCCTCAGTTGGGCAA  
TATGAATCTGGAAGGGGGCAGCCCCCTCAGACTCAACAAGACTTCATCACCCTTGAGAACACATTGGGAAGCCTGCAAAGGGCACCTTCGAGG  
GTACAGGCGATGCCACAGCAGCATCTCTGGGTACCTACCGATGGCCTCTCTGTTCGGGTACGCGACACAGGAAGACCATGACCCGCTGGACTGG  
GTGAACCCAAGCGATACCTCTCAGTGGACTGCTGACGATTACGACATGATCCGCAAGGAGGGTGTGGACCCTCAATACTTCAGCTTCGTGACGGAC  
TACGCCAAGGGCAAAAGGGCAACCTTCCGAACGCCATTGCGATGGCAAGGAGAACATGGCCTATGAGCAGCGCATCGGTAACGCTGGGACAG  
GCGCTCAGATTGTGCGTGGGTTTGCGGGGGCGGTCTGGACCCTTGACCTACACGCCTATTCCAGGGACAACCGGTGTGCGCCTCATCTCTCGGG  
TTGCTCAAGGTGCGATGTACTCGGGGGCGGTGCTGTTGCCTCTGAGGGGTACGTGAAAACATCACGGGCATTGAGGGGCACTACGGGACAGCT  
CTCGTGGGTGGTGATGTTTCGGTGCCGGGGCTACAGCTCTGTTGATAAGGCGCTGAGGGGTGCACCGCATGAGGCTCCCCGCGTAGATGTTCCA  
GACGCTGACCTTGAATCGATCCTTGCGCGACACGGTGAGTCCGCCTTGCCGAATGAGCGCTTTGACCTGCATCCCGATATGGAGCCTGACTTGAAC  
GACTTCGCGGGTCCGAGCATTGCTTGGAGGCCCGTGAGACCGCTCGCCAGTTGGGTGAGGATGATCCTTACCGGTTCCCATGTTGGCCGGTGAG  
GAACCCAAGGAAGCCTTTGGGGTGAGCTATGTTGACCATCCTAACGAGCCTGGGGCGGTGCGCTTGACGAGCAGGTTCAATCCTGTCTGCTGACAAT  
CCATTGAACCTAAGACCTTCAGGACGCCATGGAGTTATGCCGATGACCGTGCAGCCGAGGGGTGACTATGGGCGGCTTTACCGAGATTGGC  
TACACGCTGAATCGCTCGGAGAAGTCTGAGATTCTGGCGATTGGTAATCAACTGTTAGGTCTCTACAGGGACCATCAGCGGCTCTAACGGGAAG  
TTCGGGGCTACCGCTCGGACATCATTGAGCGTATCCGGGGCCAGGACCATGTGACCTACAACAAGATGTCTGATGAAGTTCTTGAGGCGATCAAA  
GACCAAGCTATGCGATGACTGACGGCGGTGCGCAAGCTCAATTGAGCGTGCTTTCAGGCGTGTGCTGAGGCCACTGAGGACCTTTCGGGTTTC  
CAAGGCGGCGCAGCTCACAGCCGGTGAGAAGAAGCTGATGGGCACCGTTAAGGCTCACTACGACCGTAAGGCTGAATACCTTGACGCGCTGCC  
AGTTTCGGCAACAGGAACGCCCAGCGGTTCTTTTCGGGCACCCGTCACGCTGGCTCGTACATCCCGAATGTCTACAGCTCAGCCGCGAAGAACCTG  
AACATCCAACGCTTCGGTGGGGCGGATGGTCTGCGCGATGCCATTAAGGAGTCGTGGTTGTCTTCCTACGCTGCACGGCCTCACGTAAAGACTCGG  
GTGGACACTCATCTGAAGGCGCTTGCGATTGCCGAGGGGCGGCTACTGGAAGACAAGGACCTTCCCGCCGCTGTTGAACTGTATGCCAGCAACAA  
GGCATAACGGCATTAGCCACTCGGACCAAGTTCGACCGTGCAACGCTCATCGACAATAGTGCCGAAGGTCTGGTTCGGCGTGGAGAACAACAATTCCT  
CGAAGGCCGTCACCTGTTTCGATTTCGGACATGGCGGTGCCCTTAGTGATGGCTCACAGTTCTCTGTGAATGACCTGCGTGAGTTTACCTGGCGCG  
CATCACCCAAGCTATGACCGCCGTGTGAACGGTGACATTGGGATCATGGGGGCCACGGGGAAAACCTACGAAGGAAGTCAAGGCTCAGATTGCAG

GGGTCCAGAAGGGGAAGGGAACGTCGCAGGAAGTGAAGGCATTGCAGGATGCGCTCAAGATTCTGACAGGCCGTGCCGAAGAGACCCGAAG  
GCGCCCTTGCAACCGCTTCCCGTGCCTTGGCAGACATGAGCTTCTTCGCCAAGAACGCCTACATGGGCGTGACAGTCAATACTGAGGTTGCCGAA  
TGGTGACTAAAGGGCACACACGGATGCTCCTGAAGGGCGTCCCACTGCTCAAGGAGATGACCGCCTGGGGCTCCAAGATCAAGGCAAAGGACCT  
TGCAGACATGCACTCTATGGTCTTCGGTCGGGAGCTGGATAACACATTTCGGCCAAACCGCCAGGACATCATCCAGCGTCTCCGAGAGCAGGCAGA  
AACAAACCTATGCTTGCCAGGTTGTGGGCTCTGTGAAGTACACCACACAGGAGCTGTCAGCTCGATCACCGTTCACCAAGTTCCTCACAGAGTC  
GTCTAACTACATCGCGGATGCAGGGCGTTCCGGGGTCTCTCGGACTTCGTGAATCATGTGGTGGACGGTTCGGGCCTCGAAGCTCTTTGAGGACAC  
CCGCTGAAGTCTATGTCTATCACCCCCGAGCAGTTCGCGGGAATGAAAGACCTGATTAAGACCTACGTGAAGAAGCAGCCTGACGGGTCTTACA  
AGATCACCGATAGAGCAGCCTTTACAGCTGACCCTCGGACAATGGACCTGTGGCGTATGGGCGACAAGATTGCAGATGAGACGATCCTACGACCA  
CACAAGCTGTCTTCGGTAGACACCGAGGCATACGGTGTGGCGTCAAGATGGCGATGCAGTTCAAGAACTTCACCATGCGTTCAGTCAACTCCCG  
GCTCATCCGTGGCTACCACGATGCCACGAAGAACGGTCGTGCAATCGACCAGACCATGCAGGCGGTTCTCTCTACGGGACTGGCCGTTTCTGGCTA  
CGTAGCGATGAAGTACAGCCAAGCGCGGGGATGCCAAAAGACCAGCGTGAGAAGTTCCTACAGCAGTCCCTTGACCCCAAGATGCTTGCTATG  
CGGCTCTGTCGCGCAGCTCCACATTGGGGCTCCTTTGGGGCTGGCGAACATCGTAGCGGCACCTTTGGGATTGATCAGGCCGCTGCTGTGCGCT  
CTTCGATTCTCCACGTGGTCCCAAAGAACACGCCCTCAAGGTGCCATGAAGTACTCCCCACGAAGTCTGAAGGGTTCACTGGGTTCCTTGCC  
GGGTATCCGAACAGGTTCCAGCAATTGGAAGTGTAGCAAGCGGGTATCAGGTGGGTTTCAACTCAATGGGGGCTGCTGGTACTGACTCCCGTCGAG  
CTGATCAGGAATACATGACAGGTGTCTTCAACGGTCTTCGCGCCTCGTGCCGAATGATCCGGTATCGCAAAGCTCTTGCTCATGCTGATGGAAG  
GGCAGGGCGTAGAGATTCGTTAAGAAAAGCGCTCCCGCAAAAGCCCCACTATAAGCAGATGTCACCACGAGTCTGCTTCTCATTACATAACTCAA  
GGAGGACTTAATGGCCGCTCCCAAGACAGTCCTAACGTATCCACTAAATGGTGCGCAAAAGGACTTTATAATTCCATTGAGTATTTGGCTCGTAAG  
TTCATCGCCGTGACCCTCATTTGGTAAAAACGGCAGACCCTACGCTTAACTCCGACTATCGGTTTACTTCCCGTACCAATGTCACGACCACAAAGG  
CGTGGGGGCCGGGGATCAATTCACAAGTATAGAGATTCGCCGGGTACTTCGGCAACTGATCGCCTCGTTGATTTTGCCGATGGGTGCGATTCTTCG  
GGCTACGATTGTAACACCTCACAGGTTCAATCGTGCACATTGCTGAAGAGGCCCGTGACCTGACGGCGGACACCATTGCGGTGAACAATGATG  
GTGATTTGGATGCCGTGGTCGGCGCCTTGTTAACCTTGAGATGCGGTGTTGGATGGTGACGCCGTTACCTTGCGGCAAGACAAAGCATGGGGCG  
CCTCGGCGTTGAATCAAGCTAACCGCTCTGAGCAACAGGCAAAACATTGCGACCCAGCAAGCTAACATTGCGGGCTCTCAGGCGCGAACTGCGGTT  
GACGCGGCGGGAACATCCACGGTCATGGCTAATGAGTCGGCGCGGCATTCTGGTAACTCAAGCACATCGGCGGCACAGTCCAAGGAATCCGCTAC  
CACTTCGATCGCCAACTCGAACCTTTTGAAGGCATGGGCTAACGCCGCTGAGGATGTTCTGGTGACCCCCGGCCTGTACTCGTCGCTGCACTACTC  
CCGCAAGTCCGCCAATAGCGCGGCTCAGGCGTATCAGGATGCAAACCGTTTCGACCACTCAAGCTGATCGATCTAAGACCGAGGCTGACCGTGCGA  
AAGTTGAGGCTGACAAGCTGGGTAACGCGAATGCCTTCATGGGCACTATCTTCGATGTTACAGGTTACGCTGTACGCTTCCGGGGTACGCATCTGAT  
AAAACAGGCGCTCTACATTAGAGGACAGGACAGATGACATAAGTGACTTTGTTAGCTGGAGTTACGAGCCTAACGGTCTGTTTATCAGCGAAG  
TCGTTATGGGGTGCCGTTACAGAGTCTTGATCCAAAGCGGCAACTTTGCTGTATCCGGCACCATACCGCAAACCTTGCGCTCGTTCTTCTGTGTCT  
CCTGCTGACTCGGGGAACGCTCACTTATGGTTGACGGTCCGAGCGGGAATCGCGGAGTAATCTACGCGGCATTGATCAGGTAATCCGGCTCCGC  
GCCGTCGAACCACAGTGGGTATGACCGTGGAGCCTAACGCAAGGTCAACACTGCCACCGATCTTATCGTGGGGGGCTTATTGGCCTGCCTCAA  
GCTACCATCCCGCTAACGCGGACATCCGCGCGAATGGATGACTGGAGGAAGTCTTTATGGAGCGCTTAGTCGCGTCACTCCTGGCACGCGCCTG  
CGTAACACCCCTCGGTAATATGGGAGCGTGGTGTGGACACAGTTGGAGGTGATGGTAGCCAAGGGGCGACGGGTTCTCAGTTTTATCTCCGCGA  
GCCTTTACAGTCCGGTGACTTCTACATGTTGAGATTTACGGCGGCGGCAAGTTTTATTTCGACAACCAACTGTATTCTTTTGGTGAGTCTGCAACC  
GAAGAACACAACGTGCAGTTTGATAGCGGTGGGGCAATGCTGTTTACCCTTACTGAAGGCGGGCGGCGCATCACTGTGAAGGCTGGCAAACCCAA  
TAATCAGTATGGGATTCGGCGTGTGTTTCATCTTCAAACCTTACCATTGCCTAAAGGAGTGCTTAATGAGTCTTGAATTTGATTTTACACAAGGGGTGGT  
TCGCGCCACTCCTGTTGTAGCTGCGGCTGGTGCTGATGTAGCAAGCCGTTTGTGCTGTTTAAACATGTCCGACTGGTTCTATGCAGCGGCCATTATC  
TATTCGTGACTCAATGCGCCGTCTTGGTCTACAAGACTGTGAAGGGGGTCCAAACAAAACAGGAGGGTTAATGTCGAATCTATTCTTGAACAAC  
TACTTGAGGCAATCGACACAGAGACAGGTAAGAATCTTTTGGTGACCTACAGAAGCCTGAGCTACGAACACCTCAGCTATACAACGCCATCGGCA  
AGTATCTCGACCGTCACAAGTTCATCTCGCTAAGTTGCAACCTGATGAGTCCCTACTGGGTGACTTGGCGTCTGCGCTTGCGGAAGTCCCTGAGTT  
GACCACGAAGAACCTTTATGGTCCAGCAACTCAACACTAAGGAGCCACAACCATGACAACCTTACCAAGGTTCTCTTGGGGCTCTGTGTGCTTG  
TCTGATAGCCCTTGGGATTTACTTCAAAGGCTATCACGACTCTGACCAGAAACACCTTAAAGAGGACGCTGAGACAGCTTTAGTCTACAGGCAGAA  
ACAGGAGGAAGAACGTGAACATCTCAAAGGCTTGGCGGATATTCTTTGCAATGGCAAGCGTACCTTAAAGACCAGTCGGCTTTGGCTGACGG  
GGTTATTGGTAGGTTGCGTAATGACGGTATCAGCCTGCGGGTCAAACCTTGCCGATGCAACCGTGCGTTCAGTCACAAGTGACGGTAGACCCGTCCC  
TGATGGTTACGCCGACTTATCAGAAGACACTTCTCGATTCTTATCGAGCAAGCTCAACGATGTGACGCCCAAGTAACGGGCCTGCAAGGAGTAAT

TAAAGAACTGCAAAGGAGTAAATGAATGATCATTAATTTGAGGGAGCACCACGACAAGAAAAAAGAACAAGCTAAATATGATGCAGAACAAAGCCG  
CACAGGAAAAAGATTCTGGGATCGCGCTAAACAGGTGAAGTGGCCGGGTGATCCTGAGTGACCCGAACTGTTTCGCACTGGCGAGCAGGACATAGCG  
TTAATGAAAAGGTCCTTTGTGGCCTTTTGTGTTGTCTGTGGCGCGCTCTAAACCTCCCTAAGCCAACCAAGTGCCAGATCGACATGGCACGTACCC  
TAAGTGACGGAAAGCAGCGAAGGTTTCATCCTGCAAGCCTCCGTGGCATCGGCAAGTCTTCATTACGTGCGCCTTTGTGGTCTGGAAGTTGTGGA  
ATAACCCACAGCTCAAGTTTCTCATCGTGTGCGCCTCGAAGGAGCGGGCAGACGCCAACTCCATTTTCATCAAGAGAATCATCGACCTACTTCCGT  
TCCTTTCAGAACTGAAGACGGGGCCAGGGCAACGGGATAGCTCGTTGAGTTTCGATGTGGGACCGGCCAAGCCGGACCACTCGCCCTCTGTGAAG  
TCTGTGGGTATCACCGGCCAACTGGCGGGCTCCCGTGTGACATCCTTATCGCGGATGACGTTGAGGTTCCGAACAACCTCCGCTACGCAGTCCGCA  
AGGGATCACCTGGGCGAACTCGTGAAGGAATTCGATGCGATCCTGAAGCCGGGTGAAGCATCCACCATCATCTACTTGGGCACGCCCCAACTGA  
GATGACTCTTATCGTGAGCTGGAAAACCGTGGCTATGTGACCACCATCTGGCCTGCGAGATACCCGAAAGACCAGAAAGACCGTGAGAGCTACG  
GCCATCGTTTGGCACCAATGATTGCGAACGAGCTGGAAGCTGACGGGACCCCTTACTGGAAACCTACAGACCCTGTTTCGATTTCGATGACACTGACT  
TGCGTGAGCGTGAGCTGTACATACGAAAGGGCGGCTTCGCTCTTCAGTTTCATGCTTAACCCGAACCTGAGCGATGCCGAGAAGTACCCGCTGAAA  
CTGCGTGACTTCATCGTGGGGCGCTTCAGCCTCGATACAGCCCCACGACCTTGCAAGTGGTTGCCGAACGGTAACAACGAAGCCAAGGGCCTGCC  
TAACGTTGGCCTGAAGGGTGATCGTTTCCACCGCTACGAGACTGTAGGTCAAGCGTCTGCACCTTACTCCGCGAAGATCCTTGTGATCGACCCGAG  
TGGTCGCGGTAAGGATGAGACAGGCTATGCCGTCCTTACATGCTCAACGGCTACATCTTCTGATGGACTGGGGCGGGTCCGTGGTGGCTACGA  
TGACAAGACCTTGACGGCCCTGGCAGACATCGGCAAGCGCTTCAAGGTCAACGAAGTGATCATTGAGGGTAACTTCGGTGATGGTATGTACGTGA  
AGCTGTTTACGTCTGTGATGACCCGTACACACCGTTGTGCAGTCACTGAGGTCAAGTCAAAGGGCCAGAAAGAGCTACGCATCTGTGACGTGCTG  
GAGCCTGTACTGGGCAGCCACAAGCTGGTGGTCTCCGAGGATGTCATTACGCGGGACTACGAGACTGCGCTGAACATCGACGGTACGACTGACAT  
CAAGTACAGCGGCTTCTATCAGTCTCAAGGATCACCAAGGACCGGGGCTCACTTGCCATGATGACCGACTCGATGCCCTGGCAATCGCGCTTCA  
GTTCTTCACAGAGGCCATGGAAAAGGATTCTGAGGTGGGAGCCTCGGAGATGCTGGAAGAGTACCTAATGCATCACATGGAAGACCCGCTTGTGG  
GCTTCGAGGATCACCGGCAGATGATGATTGGTGACGTGATGATGCAGTACGAAACAGACGGAACGACCACCAATTACATGGGGTGGTGACTACGTA  
AAGGGGCTTCGGGTCCCTTATTTTTCAGTTTGTATCAGGGCTACAAGGCACGTCTGCAAGGGCTCCAAAAGCACCCACTATAACCATAGGGAGGC  
TTAAAGTTACTCTCTTAGAGATGCCTCTGAGACCTCCTGTGTGGTGGTGGTTATCACCATCTACCACCTTCTCTATTACCAGCTCAAAGGAGGCTG  
AAGCATGATCGTTATGACTACTCGCTGGCAGACCTTTGTGGCTGTGCTTAAGGCTCTGGCGAAGCACCAGGGCTACGTACAAATTCCTTGGCGTGCTC  
TTAGTGACTCTCGGAGTTGTTCAAGGTGGTCCACTTGTGCAAACTTTGGGGATGTCGTATGTGTTCTACTTGGTGGCTGTGACGGGTGATCTATGC  
GGGATTCTCGTAGGGCTATTAGGGTGAGCCGTGGTGAAGCGACTTAACGAAGAGGGTTATTTTCCACTACATGTACTCGGTGCACTTTGAGGCCG  
CGCTTGATTCAATCAAACCTCATCAAGCGCTACAAGAGGCCGGACGTCAAATTTGCATTGCTGCGTGATGTCACCGTGGCTTACATACGGCCCTTCTC  
AAAGAACAGAGGAAGGAAGGCCAAACATGAGCTTGGTGTTAATGATGTTGTCCCAAGCACCTTCGAGACCTTCACGATGTGCTTTATAAGCTGC  
GAAGCGAGCAGTTCGCCATACTGATCTTACCTATTACGACCCGAAGTCAGTCATATATGGAGAGGGCCCTACGAGCTTGGTCTACAACGGGTTTCA  
CTATGAGGGCCTATTGGCACGCCTTCCAGAAATAGAAGAGCTTGTGAAAGCCGTAGAGAGCGTGGTGATTGCCCCGATCAGGGCATAACGAAGCAG  
AGGGCTCTGACCTCAATCACGAATCAGCGATTAGGCTTGATCCAGCCCTATCGAAGCTGTGGGGGCTCCTTTGAGAATCTGACAGAAAAATCTGAA  
GGACCACCTCAACTGTTCTATGCCGCCAGTTCCTCCCGTGGCCCTCTCGCGCTGAGCCTTATCGCATGGGTGCGCCTGGGGTCTTATCACGGGC  
CTGCACGCCTCTGTAAGTCACCCATTCCACTGTACAAATCGTTAGAACTCTGTTAGACATACTGTTAGAACTGGTTGGACAAGCTCTCTGAGATAC  
CCATAGAATGGGCCTTCCAGCCCTCATTGGTGGCCTTGC
